# Supplementary material for: Construction of porphyrin-based photocatalyst comprising pyridinium ionic liquid moiety for the metal-free visible light-assisted N-arylation of amines: facile approach to afford drug intermediates
Source: Royal Society of Chemistry journal article supplement (doi:10.1039/d3nj04295b), 2023-01-01
Supplement: d3nj04295b1.pdf [file d3nj04295b1.pdf]

# **Construction of Porphyrin Based Photocatalyst Comprising Pyridinium Ionic Liquid Moiety for Metal-Free Visible Light-Assisted N-Arylation of Amines: Facile Approach to Afford Drug Intermediates**

Bhairav Chandroday Mataghare<sup>a</sup>, and Pundlik Rambhau Bhagat<sup>a,b\*</sup>

[a] Department of Chemistry, School of Advanced Sciences, Vellore Institute of Technology, Vellore-632014, India.

[b] Carbon Dioxide Research and Green Technology Centre, Vellore Institute of Technology, Vellore-632014, India. drprbhagat111@gmail.com a,b\*

\*Corresponding author e-mail address: [drprbhagat111@gmail.com](mailto:drprbhagat111@gmail.com) (Pundlik Rambhau Bhagat)

## **Supporting information**

## Index

| S.N | Content                                                                                              | Page no | Fig No. |
|-----|------------------------------------------------------------------------------------------------------|---------|---------|
| 1   | <sup>1</sup> H NMR spectrum of 2-(4-formylbenzylidene) malononitrile ( <b>1A</b> )                   | 5       | S1      |
| 2   | <sup>13</sup> C NMR spectrum of 2-(4-formylbenzylidene) malononitrile ( <b>1A</b> )                  | 5       | S2      |
| 3   | FT-IR Spectrum of 2-(4-formyl benzylidene) malononitrile ( <b>1A</b> )                               | 6       | S3      |
| 4   | <sup>1</sup> H NMR spectrum of 1-(carboxychloromethyl)-4-formyl-pyridin-1-ium chloride ( <b>1B</b> ) | 6       | S4      |
| 5   | <sup>13</sup> CNMR spectrum of 1-(carboxychloromethyl)-4-formyl-pyridin-1-ium chloride ( <b>1B</b> ) | 7       | S5      |
| 6   | FT-IR spectrum of 1-(carboxychloromethyl)-4-formyl-pyridin-1-ium chloride ( <b>1B</b> )              | 7       | S6      |
| 7   | FT-IR Spectrum of PBILFPc Photocatalyst                                                              | 8       | S7      |
| 8   | <sup>1</sup> H NMR spectrum of Recycled PBILFPc Photocatalyst                                        | 8       | S8      |
| 9   | HRMS (M + H <sup>+</sup> ) Spectrum of PBILFPc Photocatalyst                                         | 9       | S9      |
| 10  | Comparative FT-IR Spectrum of PBILFPc Photocatalyst upto 6 <sup>th</sup> Run                         | 9       | S10     |
| 11  | <sup>1</sup> H NMR spectrum of 4-(1H-imidazol-1-yl)aniline ( <b>A2</b> )                             | 10      | S11     |
| 12  | <sup>13</sup> C NMR spectrum of 4-(1H-imidazol-1-yl)aniline ( <b>A2</b> )                            | 10      | S12     |
| 13  | <sup>1</sup> H NMR spectrum of 1-(3-methoxyphenyl)-1H-imidazole ( <b>A3</b> )                        | 11      | S13     |
| 14  | <sup>13</sup> C NMR spectrum of 1-(3-methoxyphenyl)-1H-imidazole ( <b>A3</b> )                       | 11      | S14     |
| 15  | <sup>1</sup> H NMR spectrum of 1-(4-nitrophenyl)-1H-imidazole ( <b>A4</b> )                          | 12      | S15     |
| 16  | <sup>13</sup> C NMR spectrum of 1-(4-nitrophenyl)-1H-imidazole ( <b>A4</b> )                         | 12      | S16     |
| 17  | <sup>1</sup> H NMR spectrum of 1-(3-nitrophenyl)-1H-imidazole ( <b>A5</b> )                          | 13      | S17     |
| 18  | <sup>13</sup> C NMR spectrum of 1-(3-nitrophenyl)-1H-imidazole ( <b>A5</b> )                         | 13      | S18     |
| 19  | <sup>1</sup> H NMR spectrum of 4-(1H-imidazol-1-yl)phenol ( <b>A6</b> )                              | 14      | S19     |
| 20  | <sup>13</sup> C NMR spectrum of 4-(1H-imidazol-1-yl)phenol ( <b>A6</b> )                             | 14      | S20     |
| 21  | <sup>1</sup> H NMR spectrum of 1-(2,4-dinitrophenyl)-1H-imidazole ( <b>A7</b> )                      | 15      | S21     |

|    |                                                                                 |    |     |
|----|---------------------------------------------------------------------------------|----|-----|
| 22 | <sup>13</sup> C NMR spectrum of 1-(2,4-dinitrophenyl)-1H-imidazole (A7)         | 15 | S22 |
| 23 | <sup>1</sup> H NMR spectrum of 1-phenyl-1H-imidazole (A8)                       | 16 | S23 |
| 24 | <sup>1</sup> H NMR spectrum of 1-trityl-1H-imidazole (A9)                       | 16 | S24 |
| 25 | <sup>13</sup> C NMR spectrum of 1-trityl-1H-imidazole (A9)                      | 17 | S25 |
| 26 | <sup>1</sup> H NMR spectrum of 4-(1H-1,2,4-triazol-1-yl)benzaldehyde (A10)      | 17 | S26 |
| 27 | <sup>13</sup> C NMR spectrum of 4-(1H-1,2,4-triazol-1-yl)benzaldehyde (A10)     | 18 | S27 |
| 28 | <sup>1</sup> H NMR spectrum of 1-(3-nitrophenyl)-1H-1,2,4-triazole (A11)        | 18 | S28 |
| 29 | <sup>1</sup> H NMR spectrum of 1-(2,4-dinitrophenyl)-1H-1,2,4-triazole (A12)    | 19 | S29 |
| 30 | <sup>1</sup> H NMR spectrum of 1-(4-nitrophenyl)-1H-1,2,4-triazole (A13)        | 19 | S30 |
| 31 | <sup>1</sup> H NMR spectrum of 4-(4-nitrophenyl)morpholine (A14)                | 20 | S31 |
| 32 | <sup>1</sup> H NMR spectrum of 4-(3-nitrophenyl)morpholine (A15)                | 20 | S32 |
| 33 | <sup>1</sup> H NMR spectrum of 4-(2,4-dinitrophenyl)morpholine (A16)            | 21 | S33 |
| 34 | <sup>1</sup> H NMR spectrum of 1-(3-nitrophenyl)-1H-indole (A17)                | 21 | S34 |
| 35 | <sup>13</sup> C NMR spectrum of 1-(3-nitrophenyl)-1H-indole (A17)               | 22 | S35 |
| 36 | <sup>1</sup> H NMR spectrum of 1-(4-nitrophenyl)-1H-indole (A18)                | 22 | S36 |
| 37 | <sup>1</sup> H NMR spectrum of 1-phenyl-1H-indole (A19)                         | 23 | S37 |
| 38 | <sup>1</sup> H NMR spectrum of 4-(1H-benzo[d]imidazol-1-yl)benzaldehyde (A20)   | 23 | S38 |
| 39 | <sup>1</sup> H NMR spectrum of 1-(4-nitrophenyl)-1H-benzo[d]imidazole (A21)     | 24 | S39 |
| 40 | <sup>1</sup> H NMR spectrum of 1-(2,4-dinitrophenyl)-1H-benzo[d]imidazole (A22) | 24 | S40 |
| 41 | GCMS spectrum of Reaction Mixture after 5 hours                                 | 25 | S41 |
| 42 | GCMS spectrum of Reaction Mixture after 10 hours                                | 26 | S42 |
| 43 | GCMS spectrum of Reaction Mixture after 15 hours                                | 27 | S43 |
| 44 | GCMS spectrum of Reaction Mixture after 20 hours                                | 28 | S44 |
| 45 | GCMS spectrum of 4-(1H-imidazol-1-yl)benzaldehyde A1                            | 29 | S45 |
| 46 | GCMS spectrum of Aryl radical with TEMPO                                        | 30 | S46 |
| 47 | Leaching Test of PBILFPc Photocatalyst.                                         | 31 | S47 |
| 48 | BET Surface Area of PBILFPc Photocatalyst.                                      | 32 | S48 |

|    |                                                                            |    |     |
|----|----------------------------------------------------------------------------|----|-----|
|    |                                                                            |    |     |
| 49 | BET Isotherm Parameters of PBILFPc Photocatalyst.                          | 33 | S49 |
| 50 | BET Adsorption/Desorption Isotherm of PBILFPc Photocatalyst.               | 34 | S50 |
| 51 | TON & TOF Calculation as per the reviewer's suggestion                     | 35 |     |
| 52 | Preparation of Stock Solution for UV-visible and Fluorescence Spectroscopy | 35 |     |

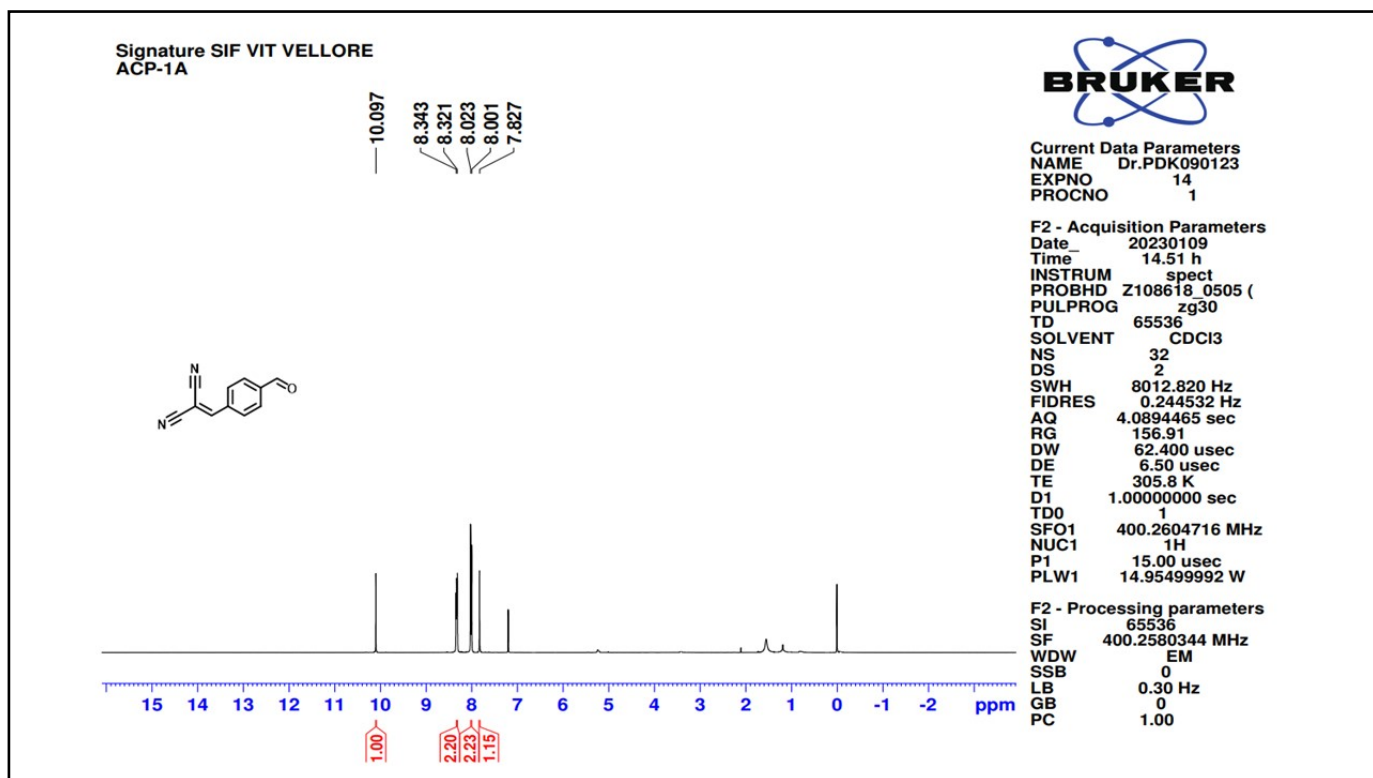

Fig S1. <sup>1</sup>H NMR spectrum of 2-(4-formylbenzylidene) malononitrile (1A)

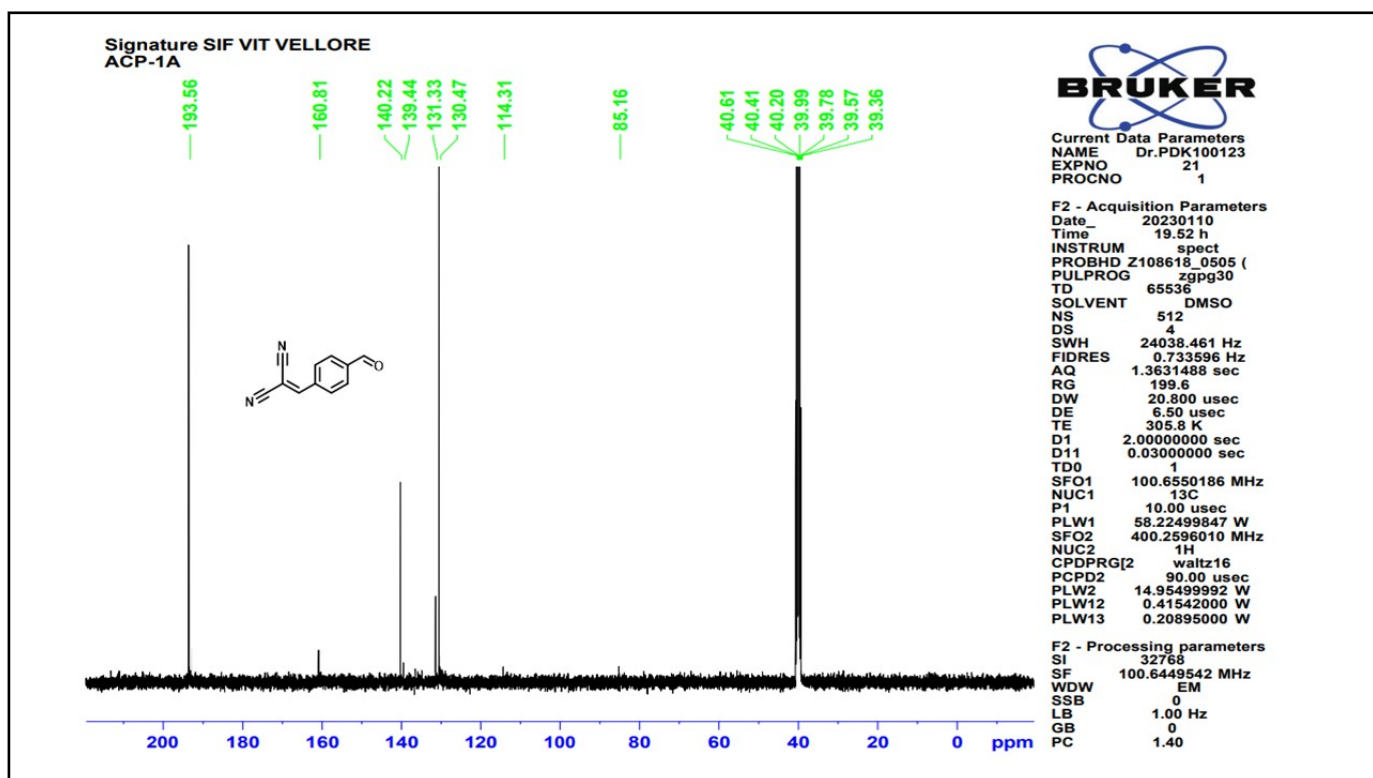

Fig S2. <sup>13</sup>C NMR spectrum of 2-(4-formylbenzylidene) malononitrile (1A)

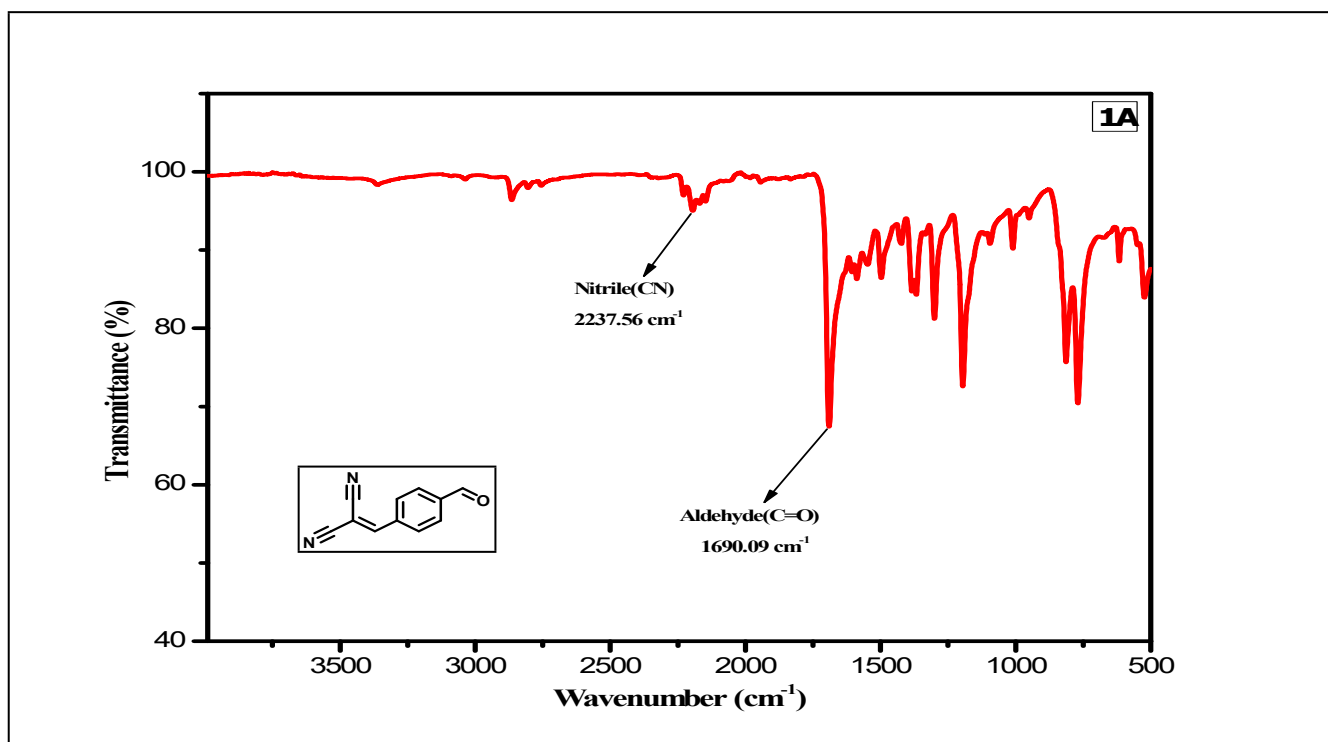

Fig. S3. FT-IR Spectrum of 2-(4-formyl benzylidene) malononitrile (**1A**)

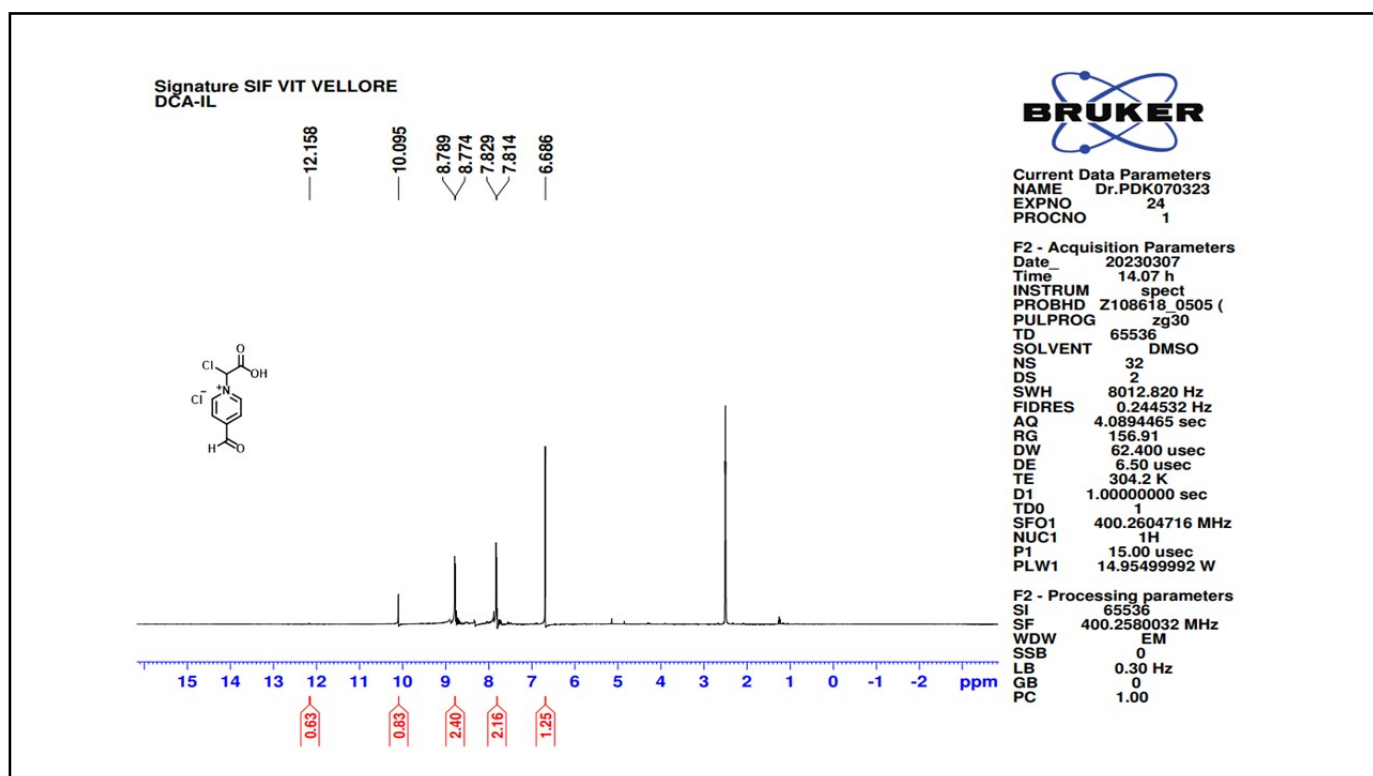

Fig S4. <sup>1</sup>H NMR spectrum of 1-(carboxychloromethyl)-4-formylpyridin-1-ium chloride (**1B**)

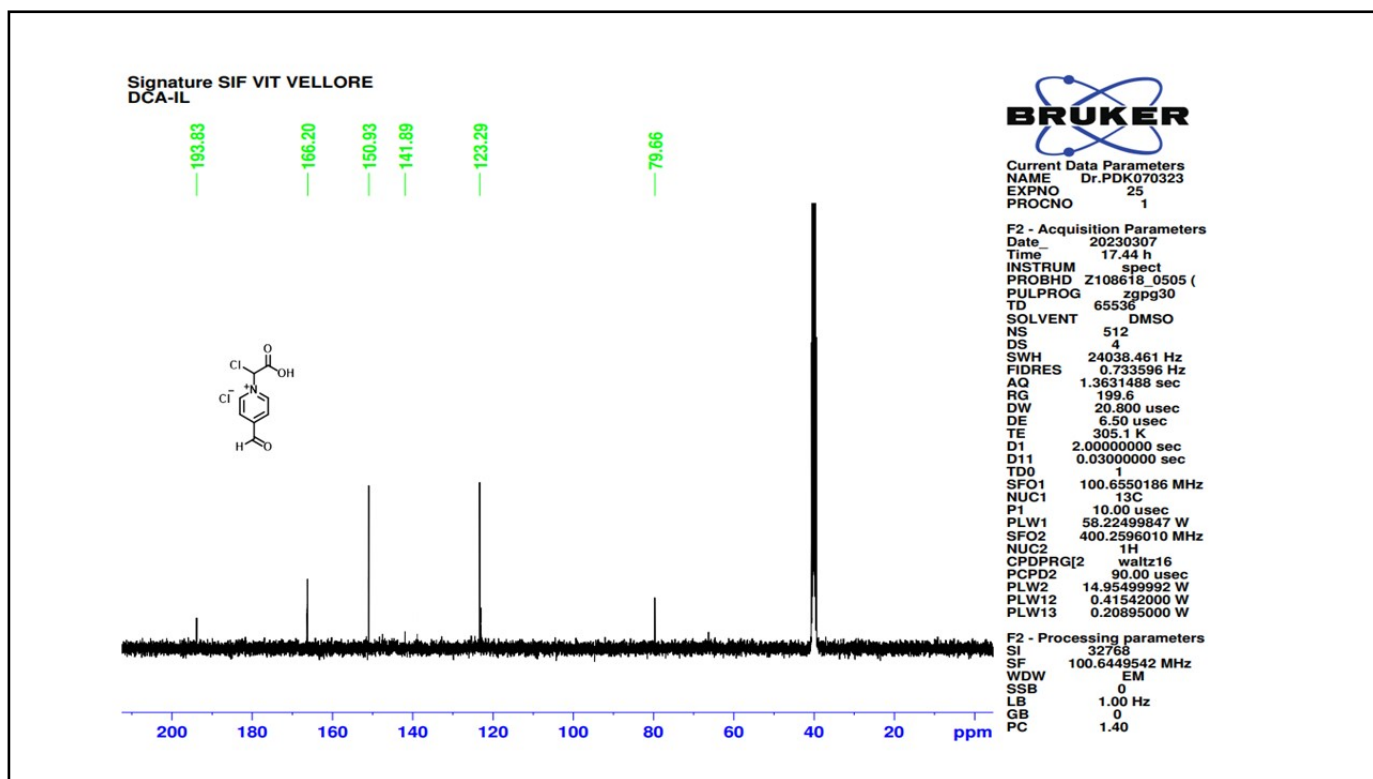

Fig S5.  $^{13}\text{C}$ NMR spectrum of 1-(carboxychloromethyl)-4-formylpyridine-1-ium chloride (**1B**)

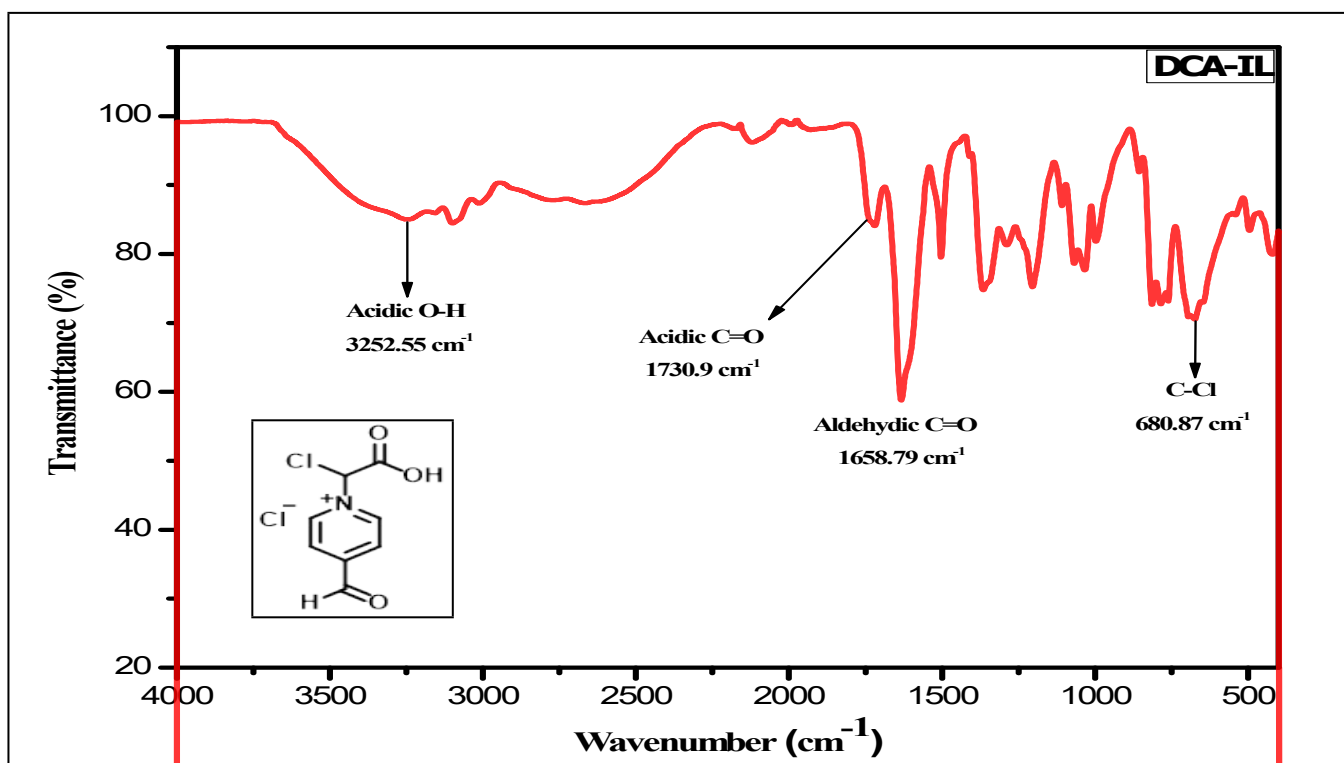

Fig S6. FT-IR spectrum of 1-(carboxychloromethyl)-4-formylpyridine-1-ium chloride (**1B**)

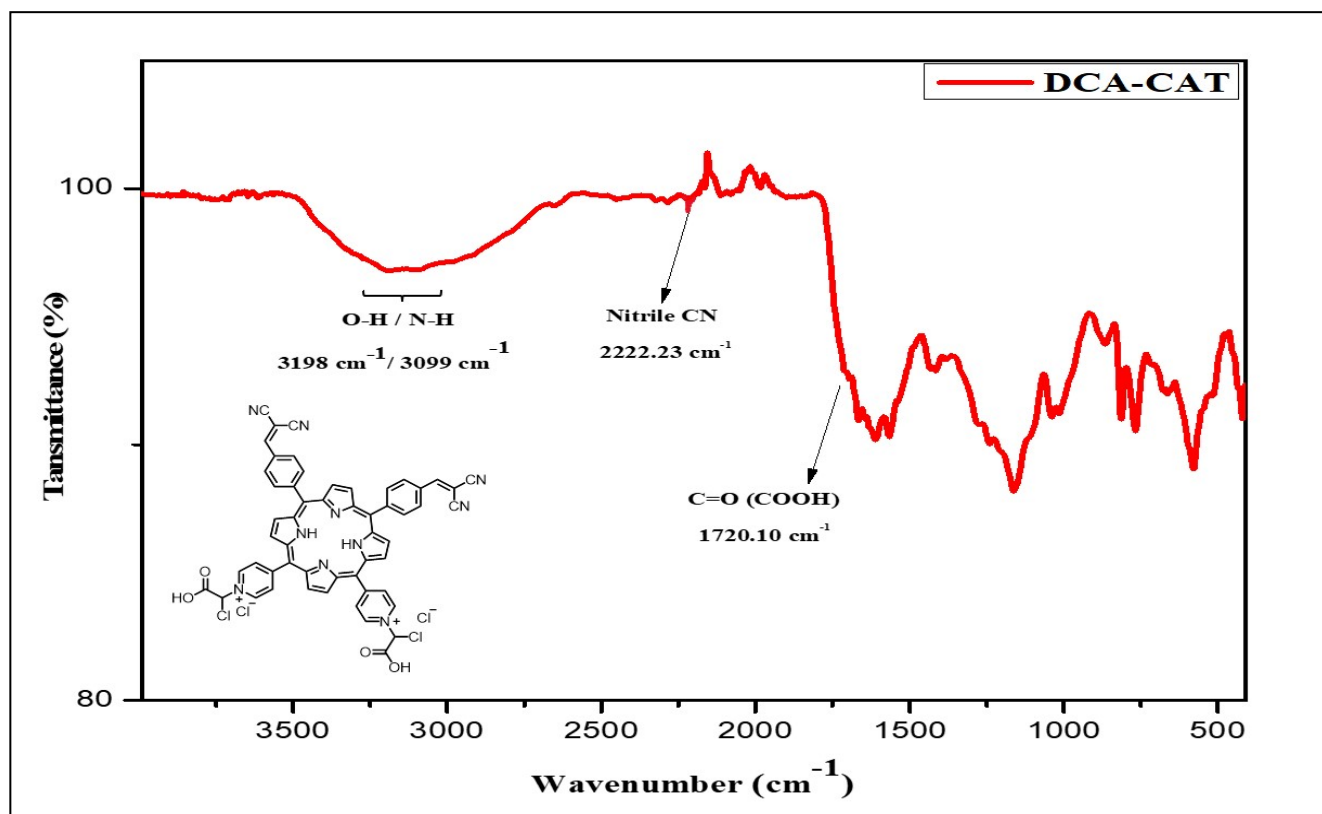

Fig S7. FT-IR Spectrum of PBILFPc Photocatalyst

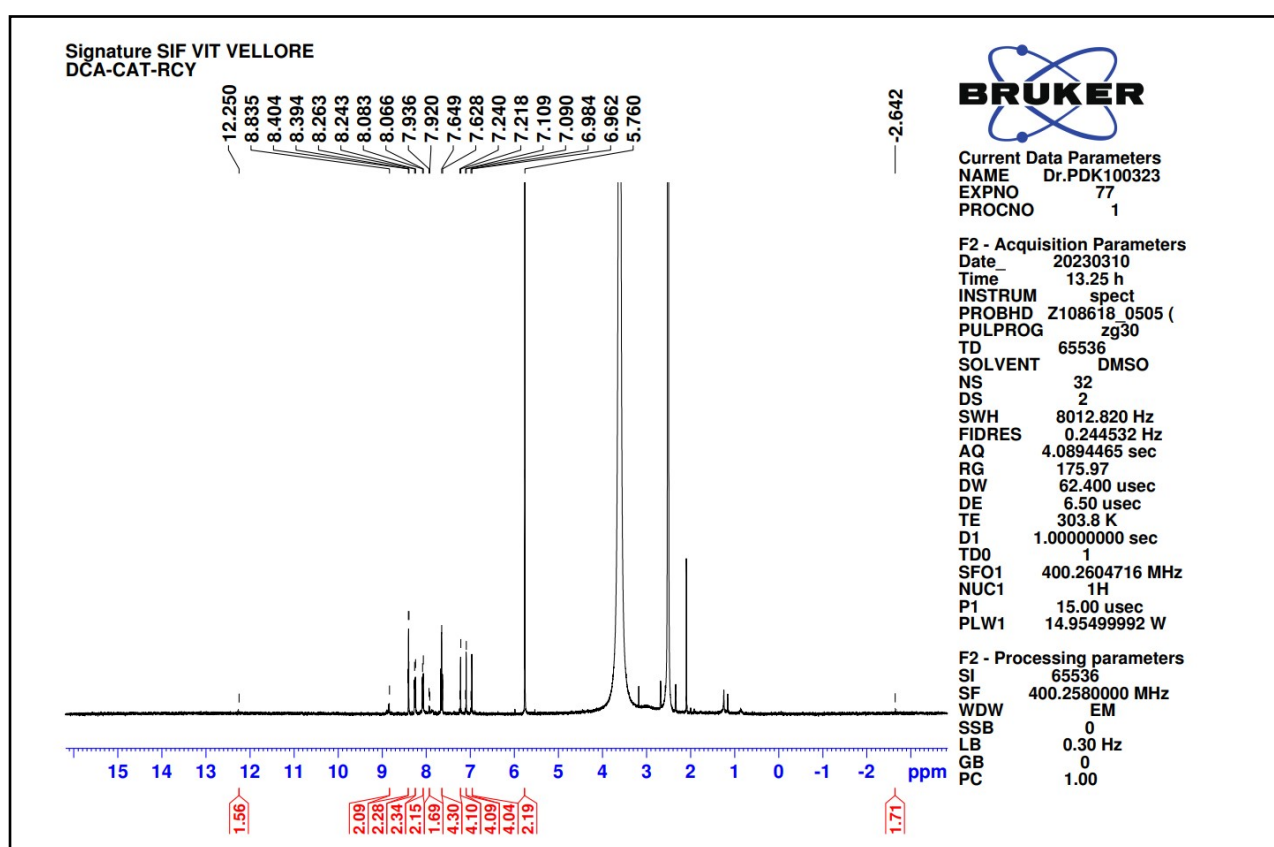

Fig S8. <sup>1</sup>H NMR spectrum of Recycled PBILFPc Photocatalyst



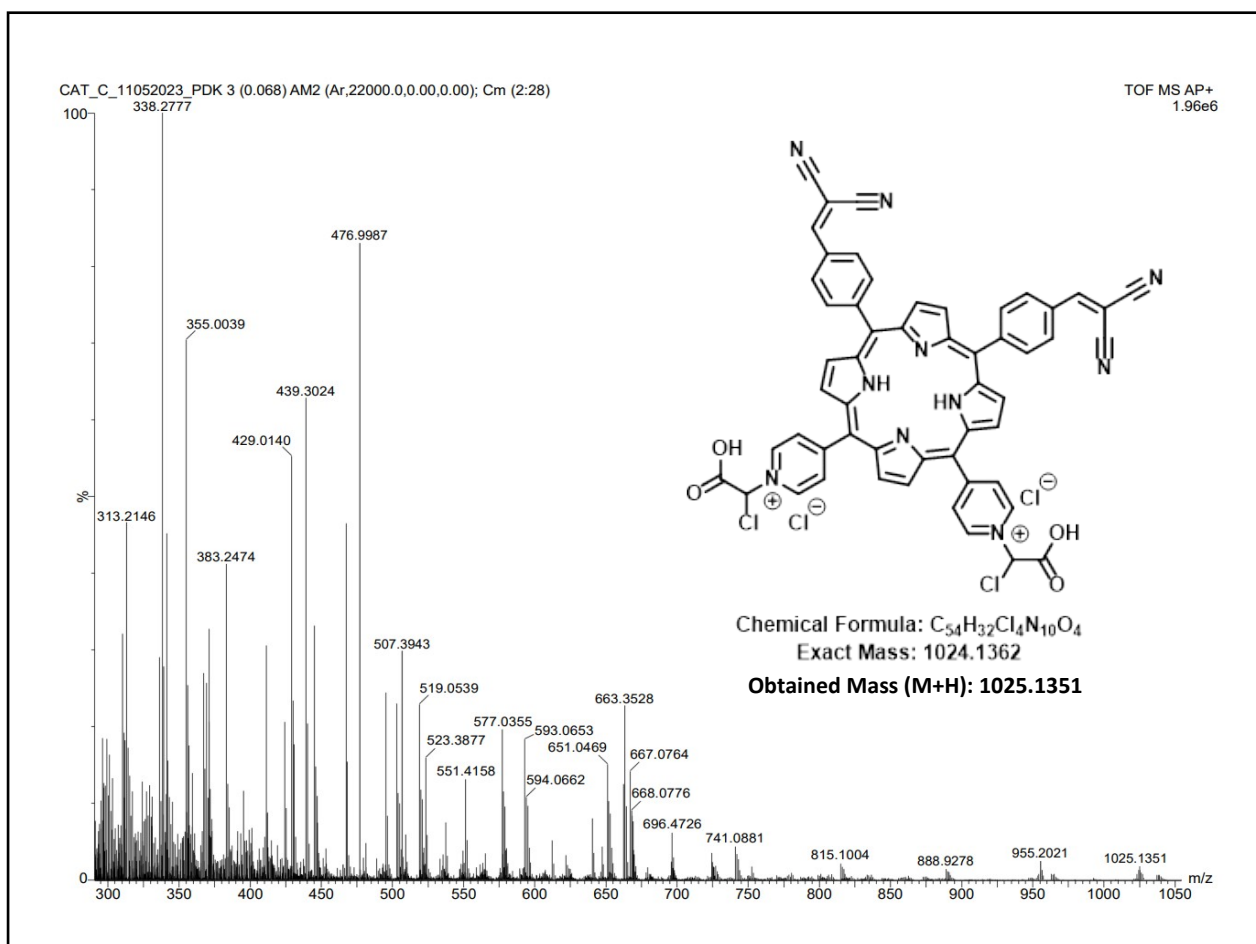

Fig S9. HRMS (M + H)<sup>+</sup> Spectrum of PBILFPc Photocatalyst

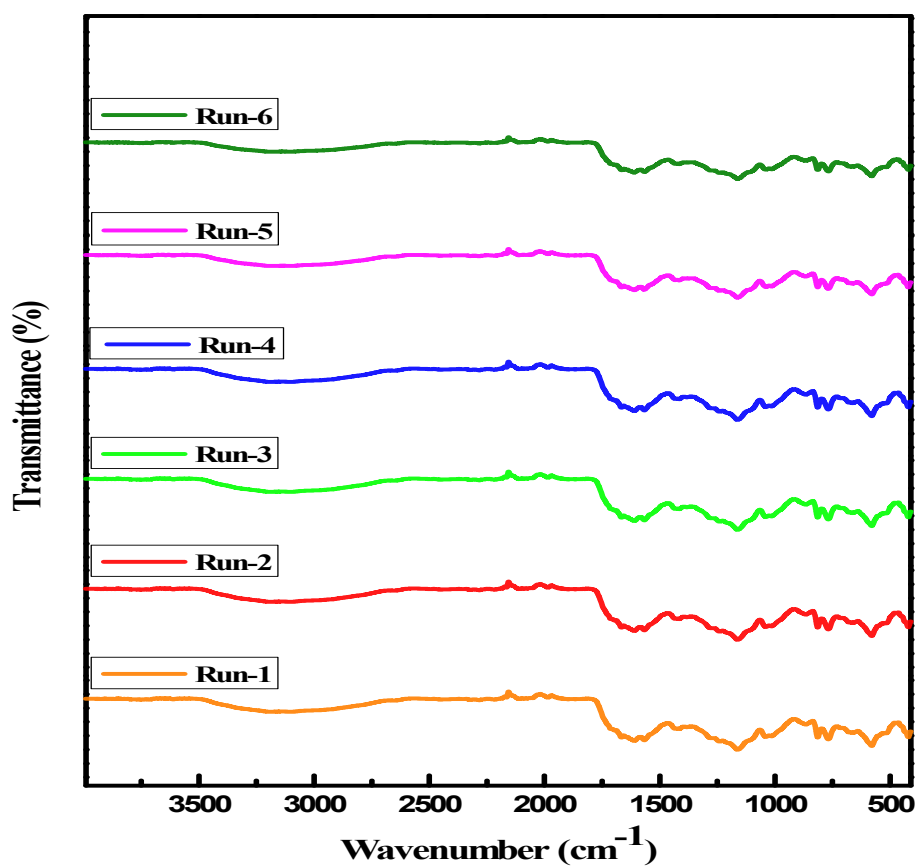

Fig S10. Comparative FT-IR Spectrum of PBILFPc Photocatalyst up to 6<sup>th</sup> Run

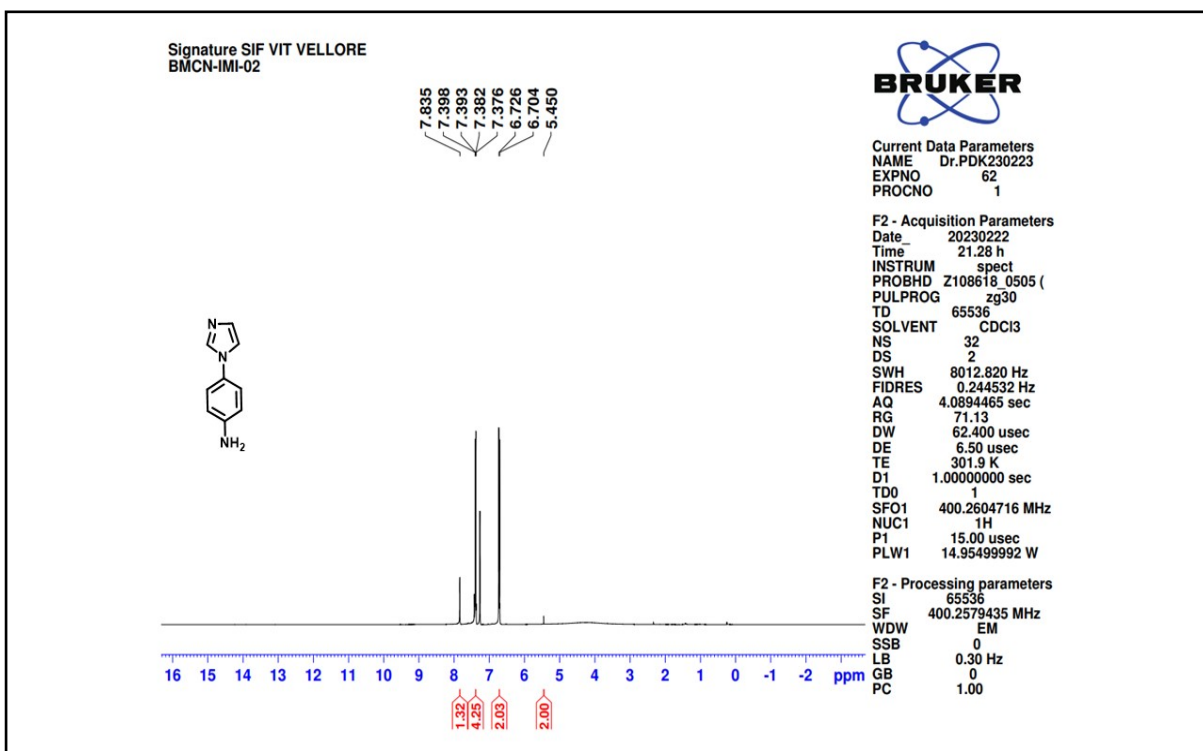

Fig S11.  $^1\text{H}$  NMR spectrum of 4-(1H-imidazol-1-yl)aniline (A2)

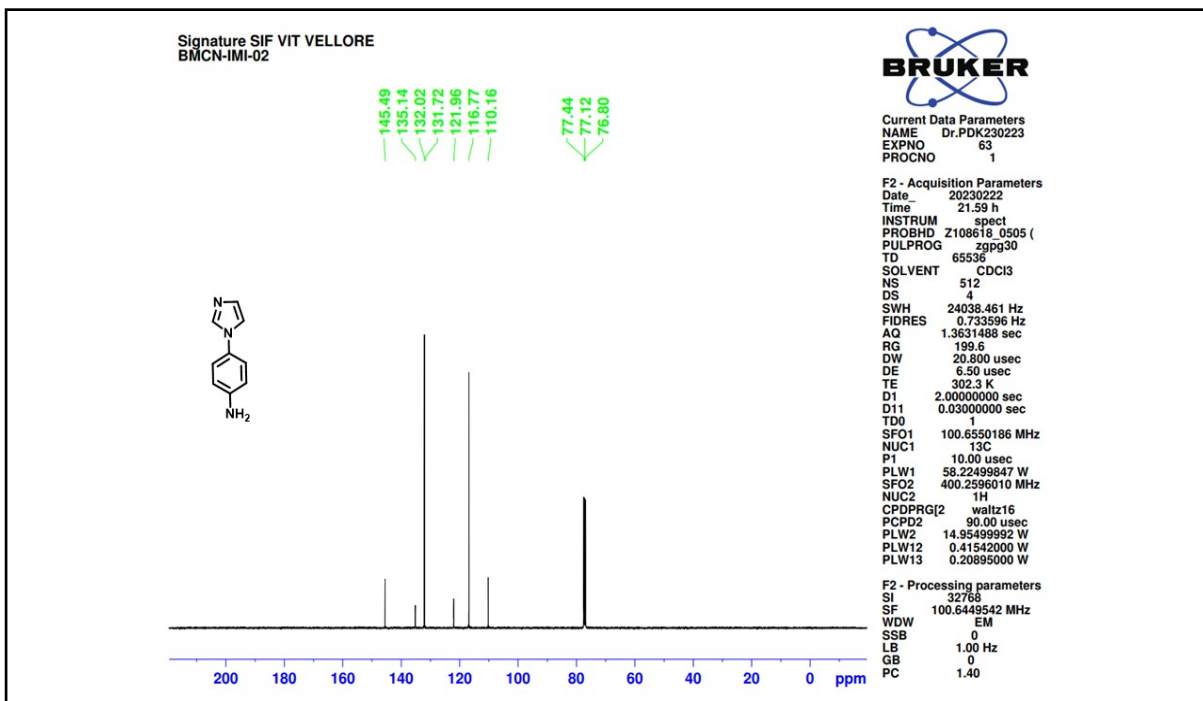

Fig S12.  $^{13}\text{C}$  NMR spectrum of 4-(1H-imidazol-1-yl)aniline (A2)

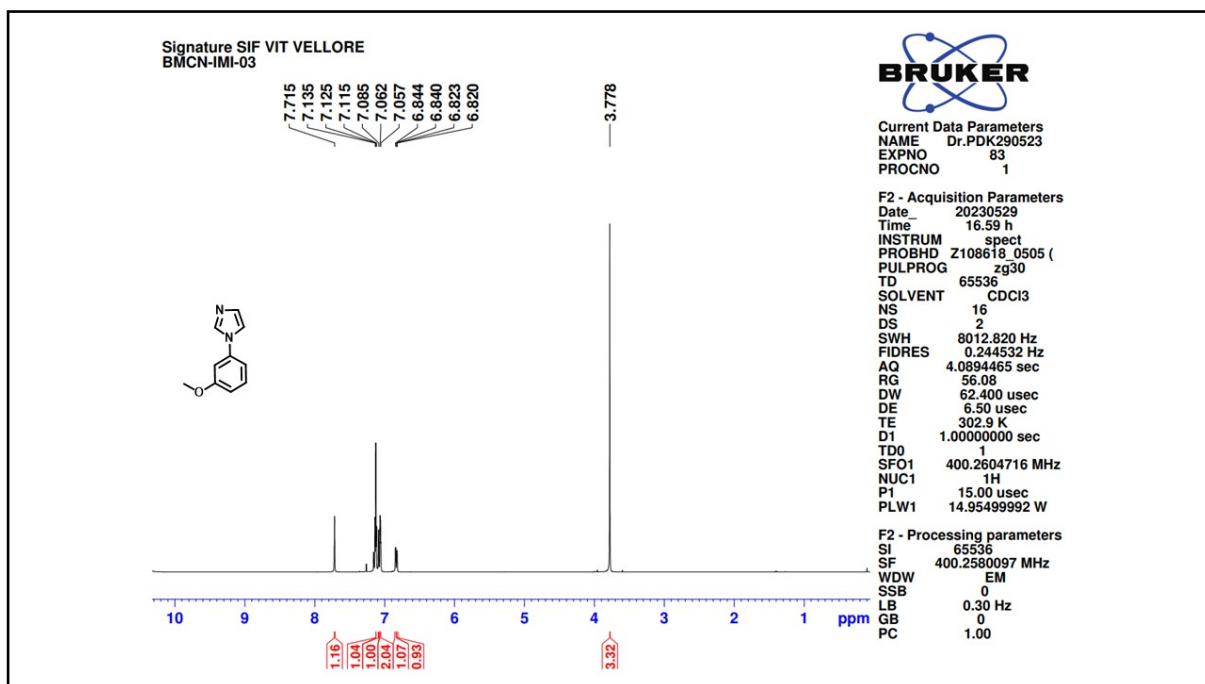

Fig S13. <sup>1</sup>H NMR spectrum of 1-(3-methoxyphenyl)-1H-imidazole (A3)

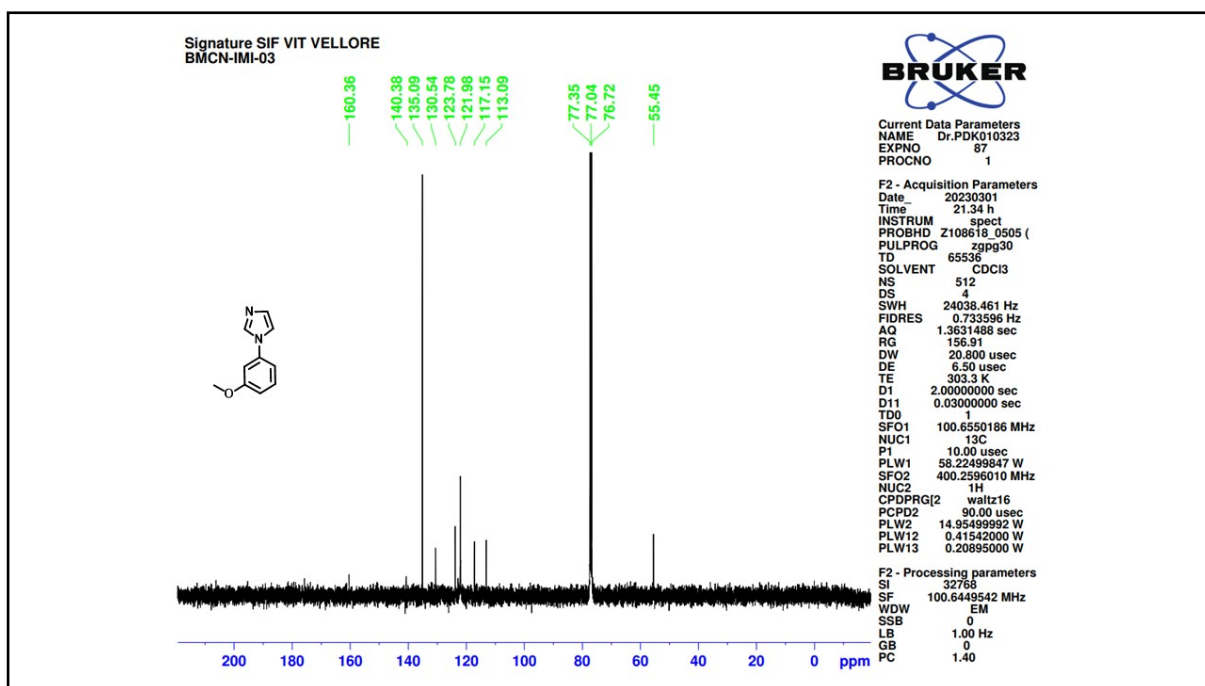

Fig S14. <sup>13</sup>C NMR spectrum of 1-(3-methoxyphenyl)-1H-imidazole (A3)

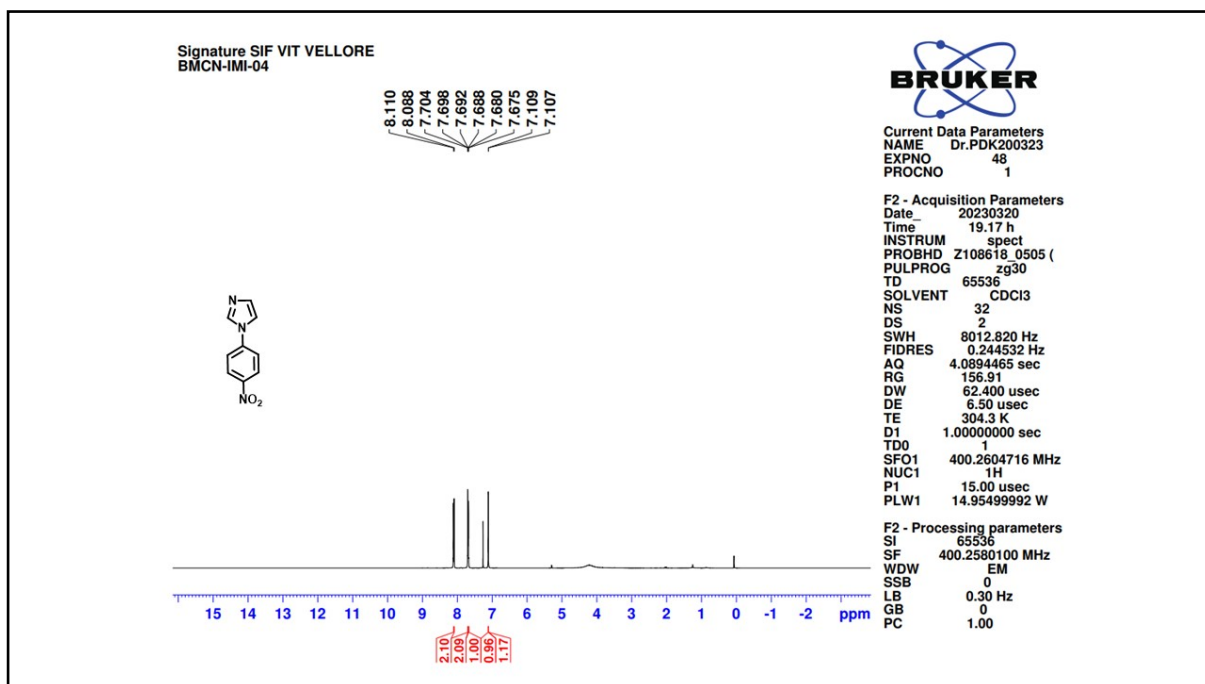

Fig S15. <sup>1</sup>H NMR spectrum of 1-(4-nitrophenyl)-1H-imidazole (A4)

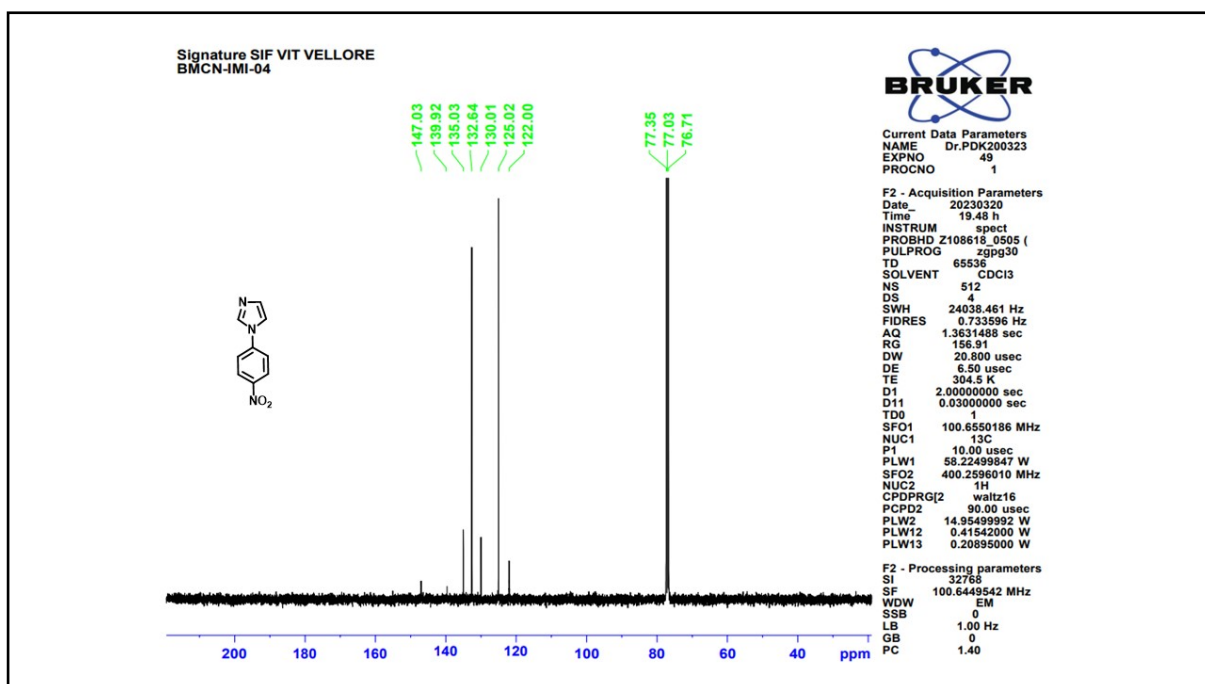

Fig S16. <sup>13</sup>C NMR spectrum of 1-(4-nitrophenyl)-1H-imidazole (A4)

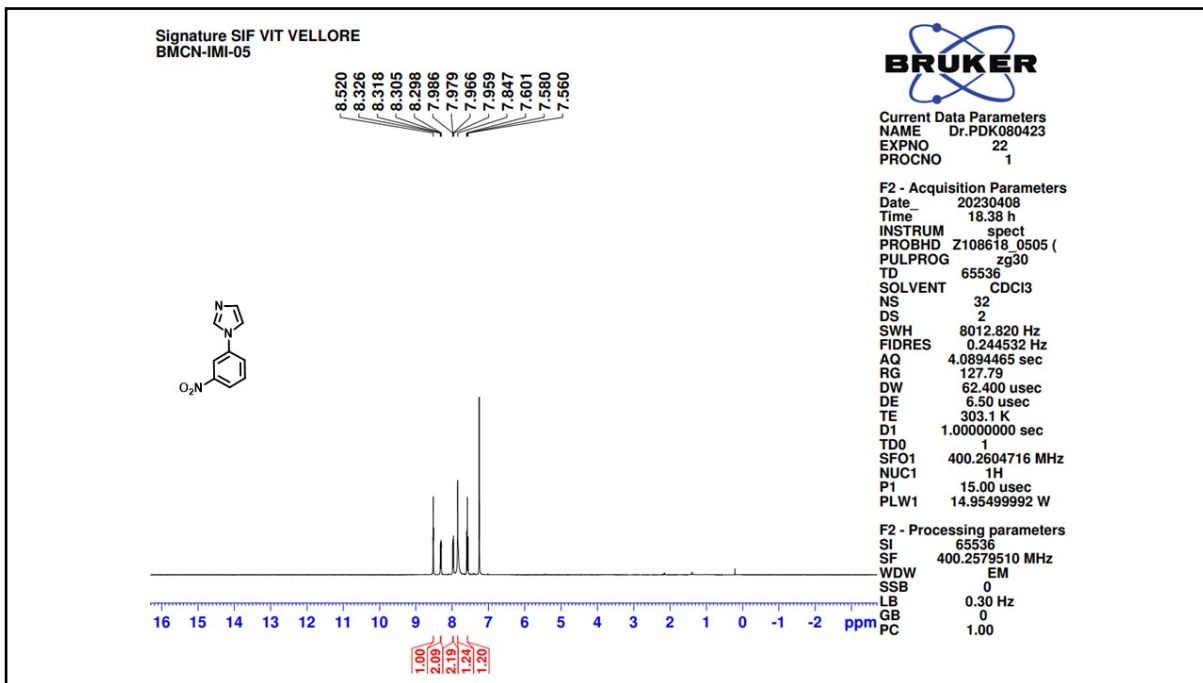

Fig S17. <sup>1</sup>H NMR spectrum of 1-(3-nitrophenyl)-1H-imidazole (A5)

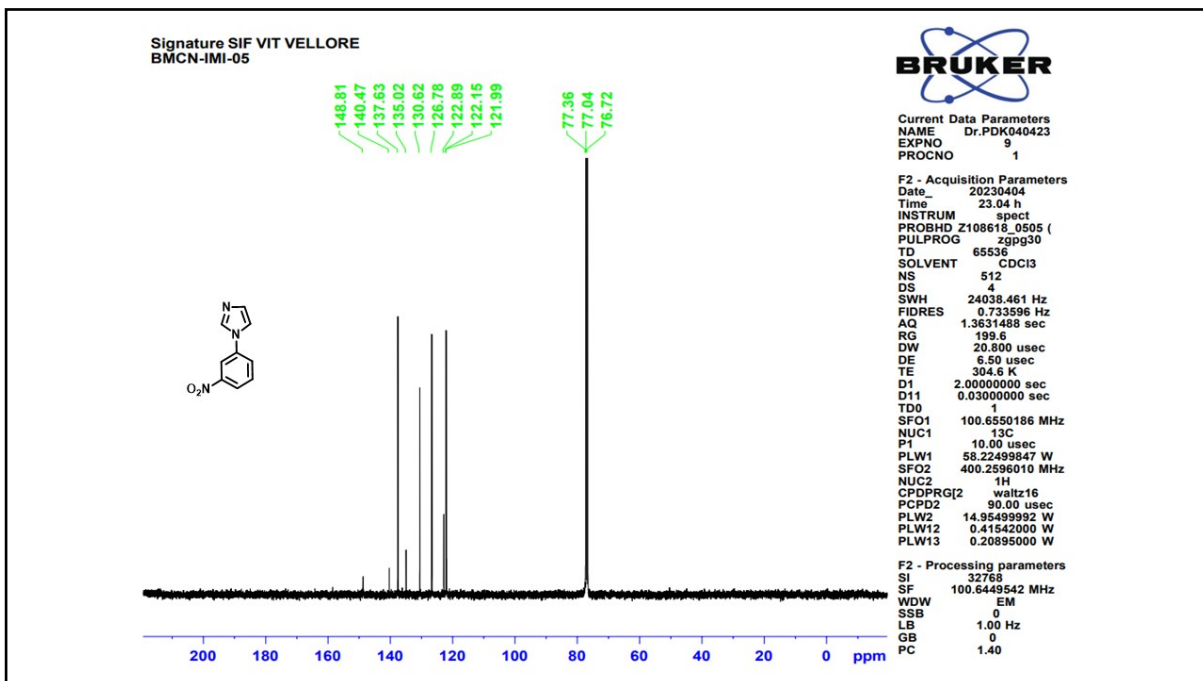

Fig S18. <sup>13</sup>C NMR spectrum of 1-(3-nitrophenyl)-1H-imidazole (A5)

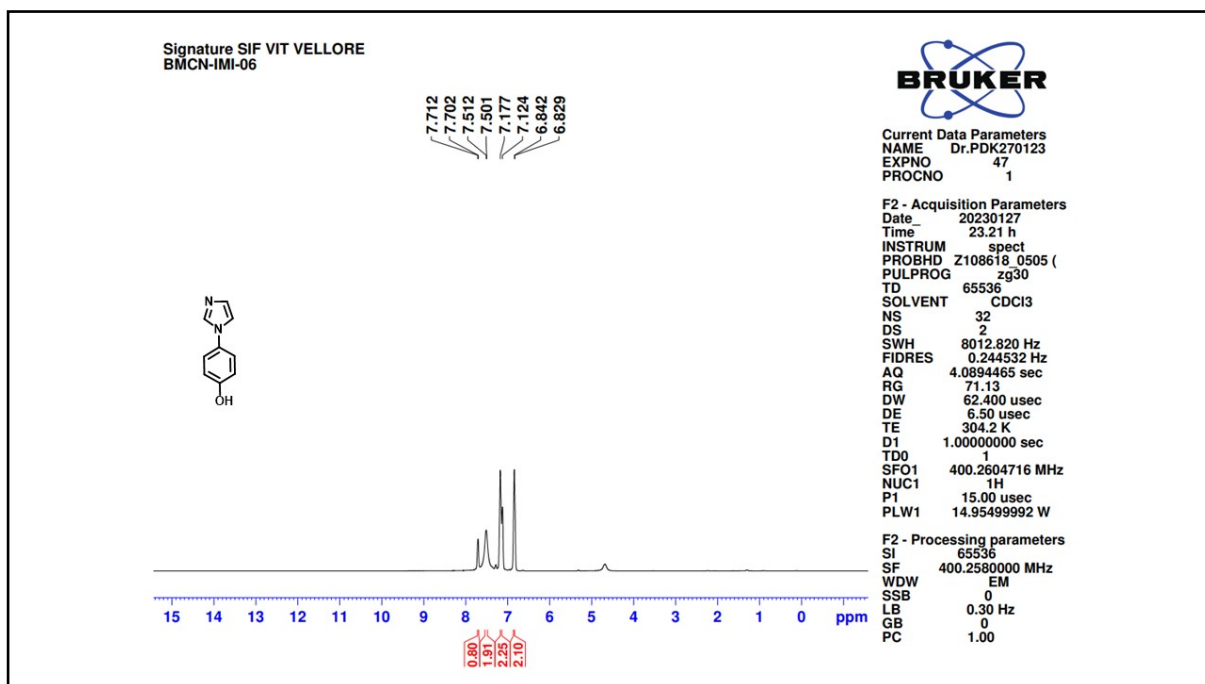

Fig S19. <sup>1</sup>H NMR spectrum of 4-(1H-imidazol-1-yl)phenol (A6)

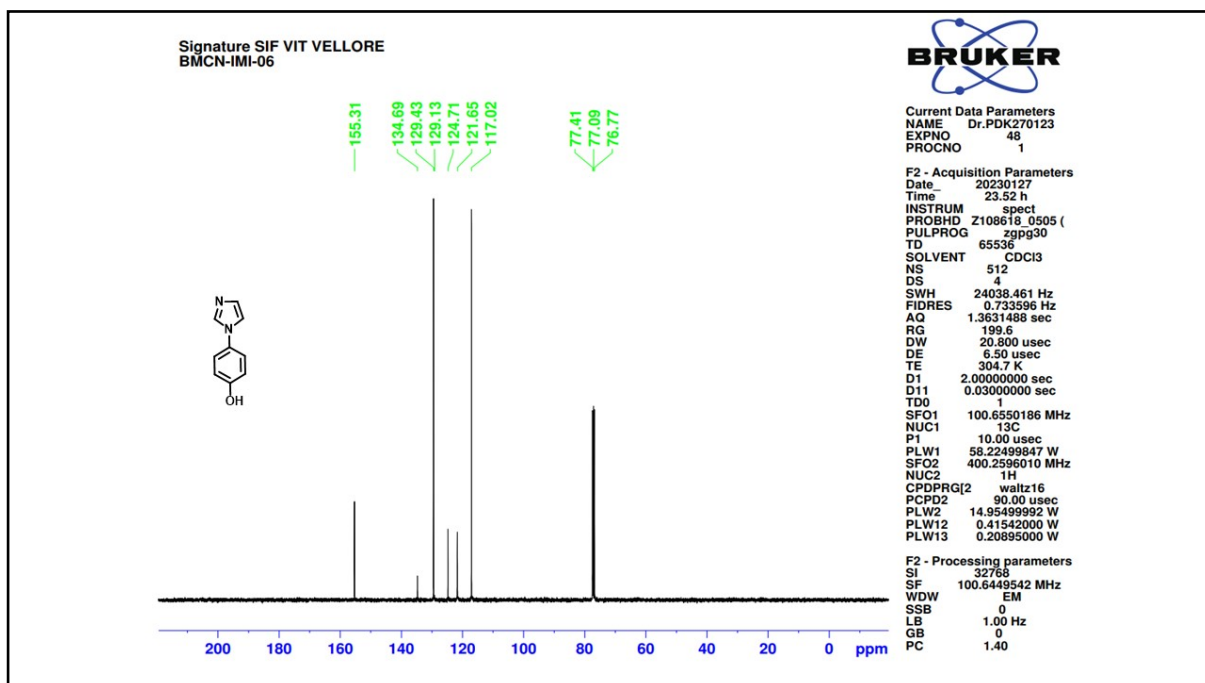

Fig S20. <sup>13</sup>C NMR spectrum of 4-(1H-imidazol-1-yl)phenol (A6)

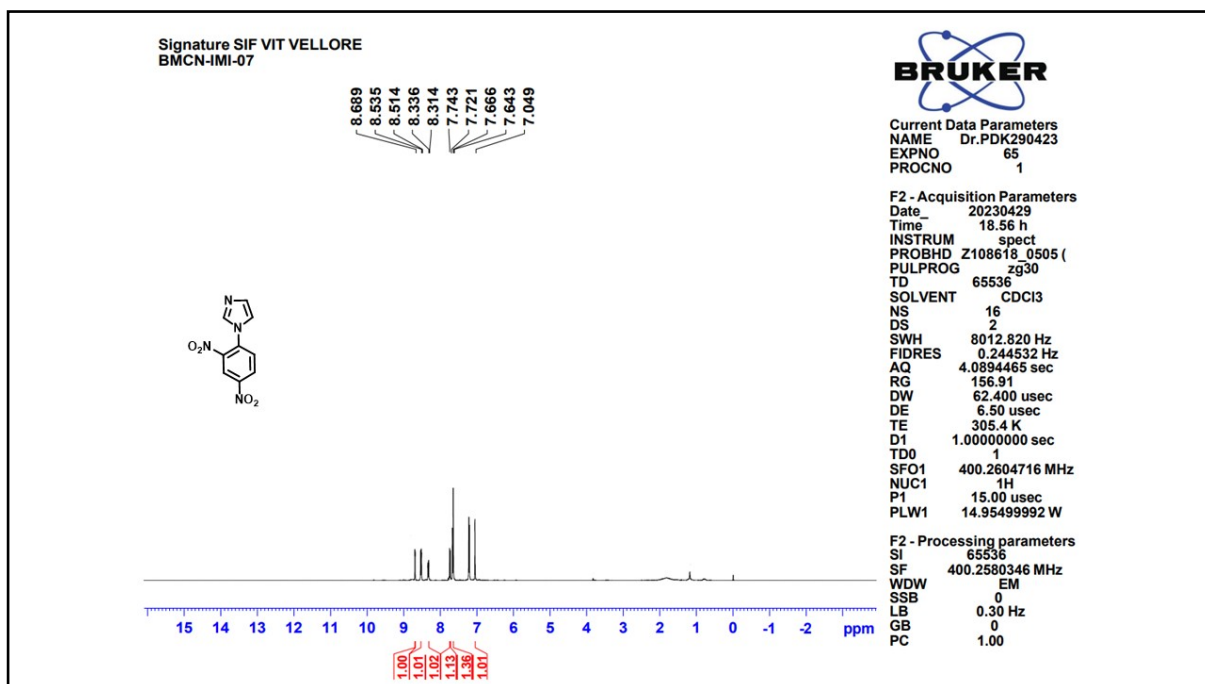

Fig S21. <sup>1</sup>H NMR spectrum of 1-(2,4-dinitrophenyl)-1H-imidazole (A7)

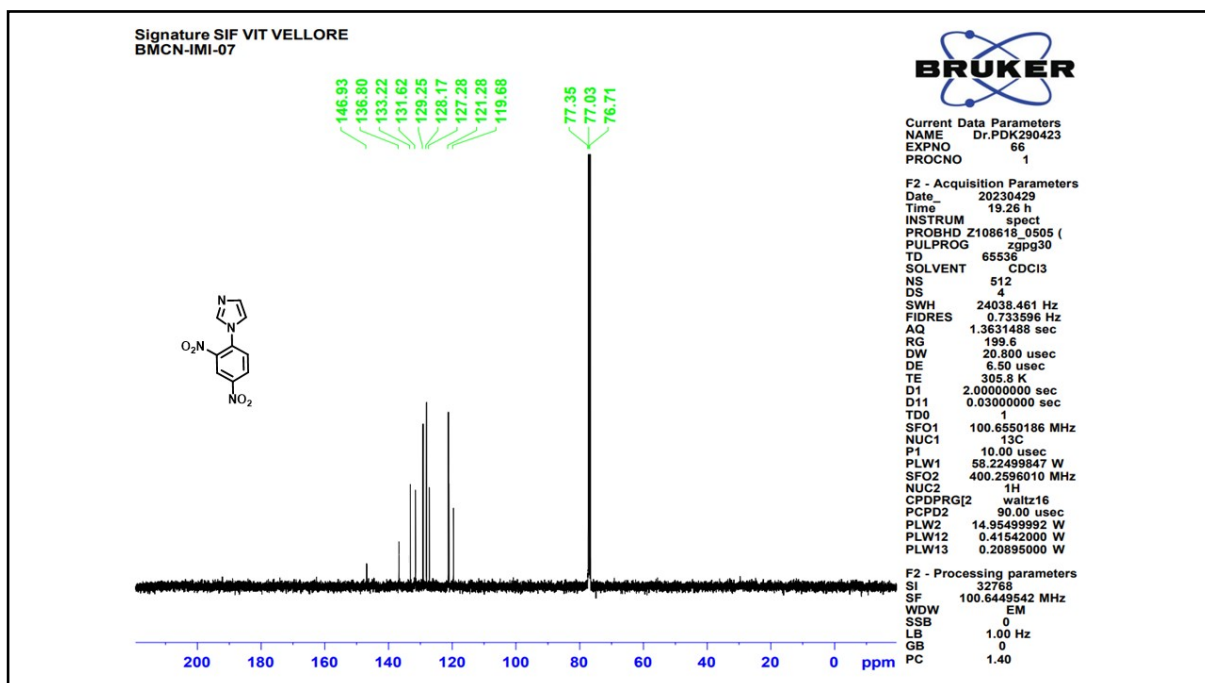

Fig S22. <sup>13</sup>C NMR spectrum of 1-(2,4-dinitrophenyl)-1H-imidazole (A7)

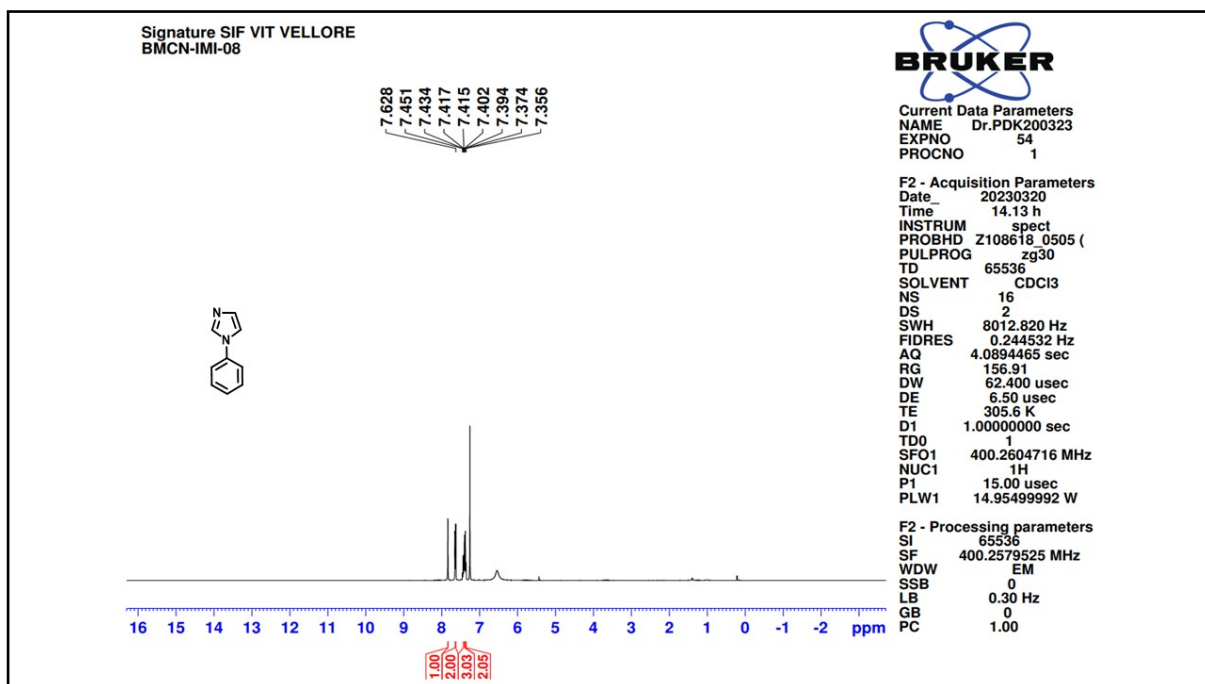

Fig S23. <sup>1</sup>H NMR spectrum of 1-phenyl-1H-imidazole (A8)

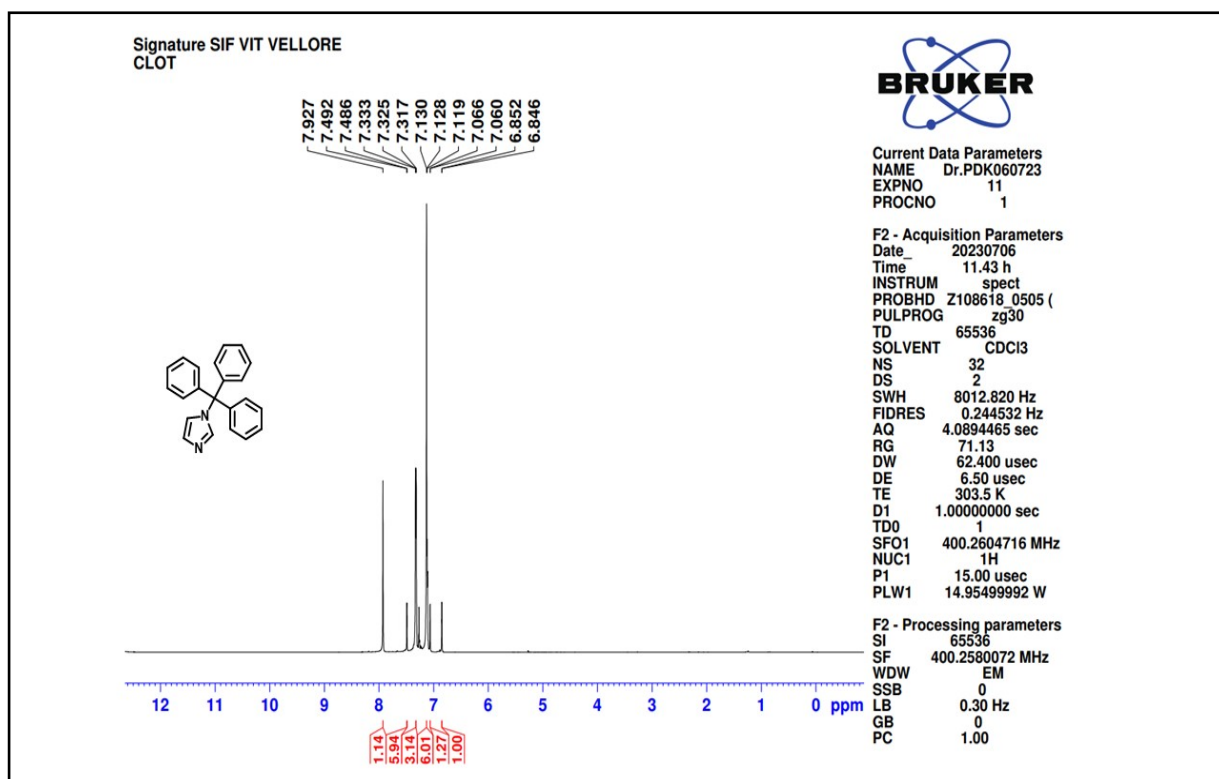

Fig S24. <sup>1</sup>H NMR spectrum of 1-trityl-1H-imidazole (A9)



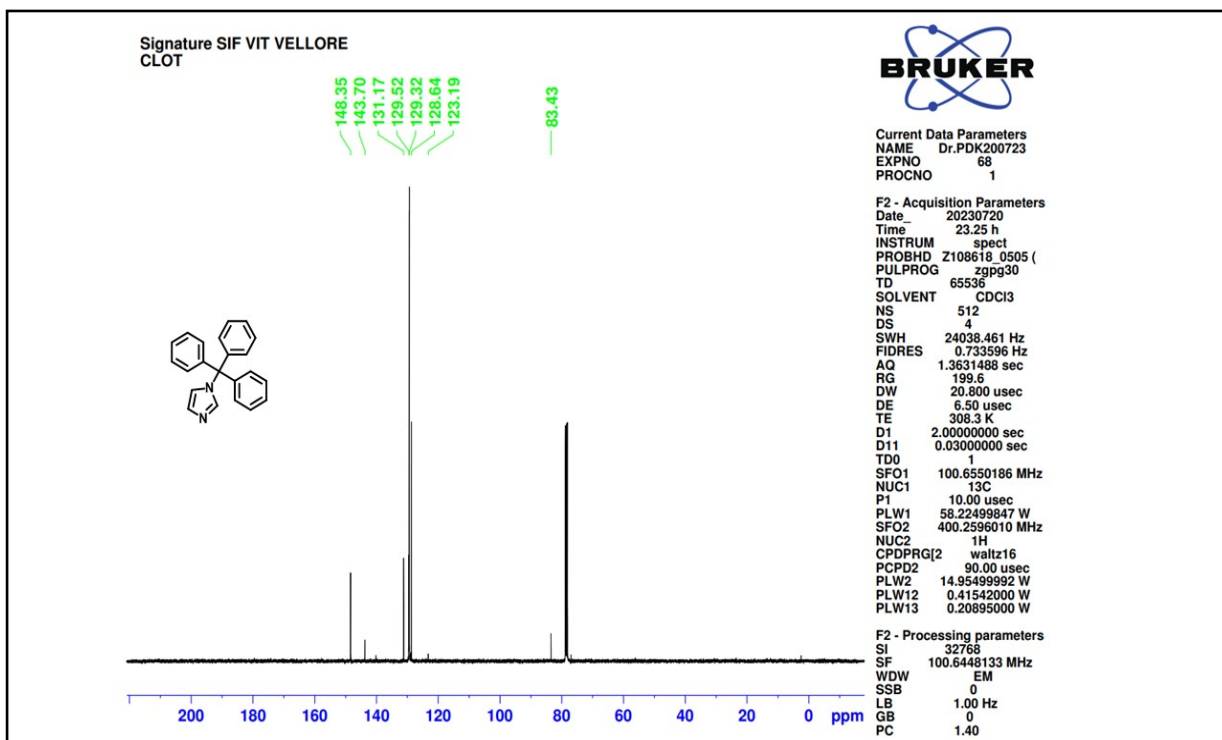

Fig S25.  $^{13}\text{C}$  NMR spectrum of 1-trityl-1H-imidazole (A9)

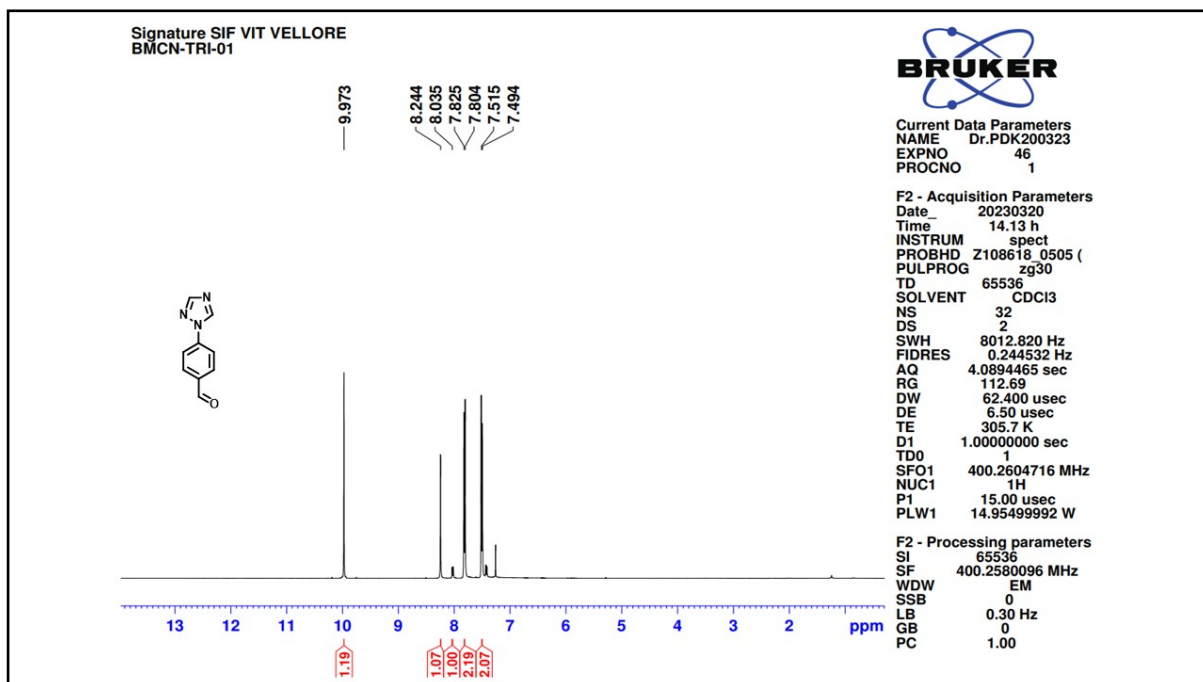

Fig S26.  $^1\text{H}$  NMR spectrum of 4-(1H-1,2,4-triazol-1-yl)benzaldehyde (A10)

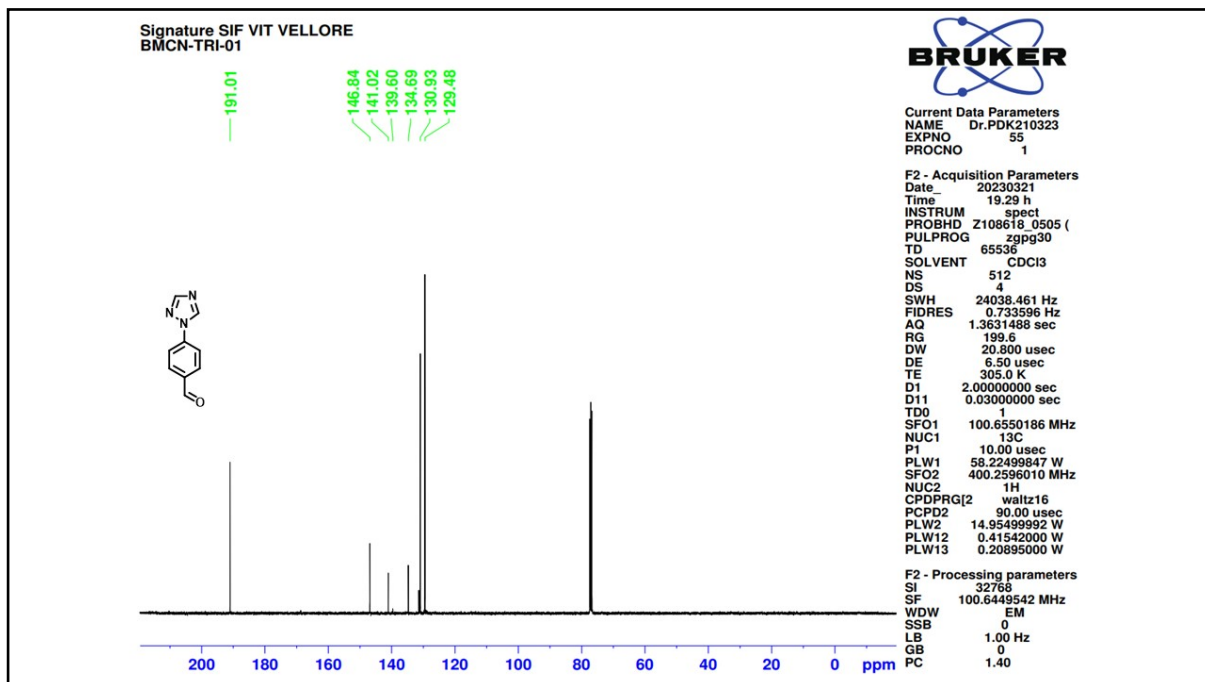

Fig S27.  $^{13}\text{C}$  NMR spectrum of 4-(1H-1,2,4-triazol-1-yl)benzaldehyde (A10)

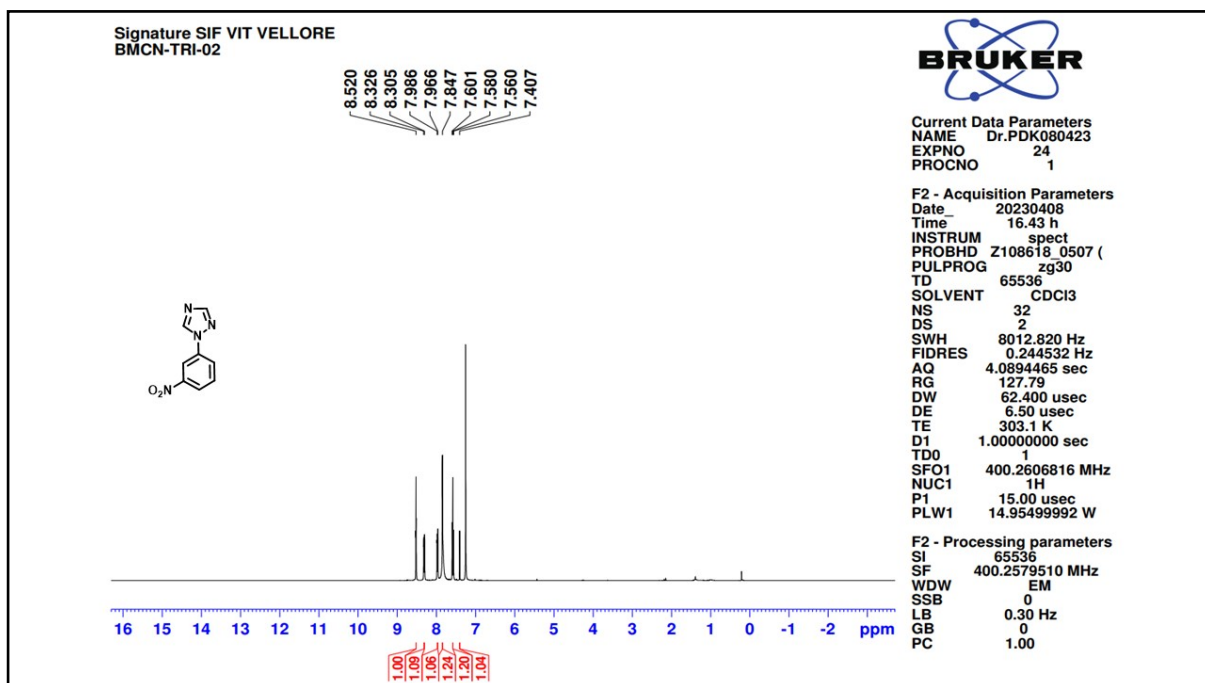

Fig S28.  $^1\text{H}$  NMR spectrum of 1-(3-nitrophenyl)-1H-1,2,4-triazole (A11)

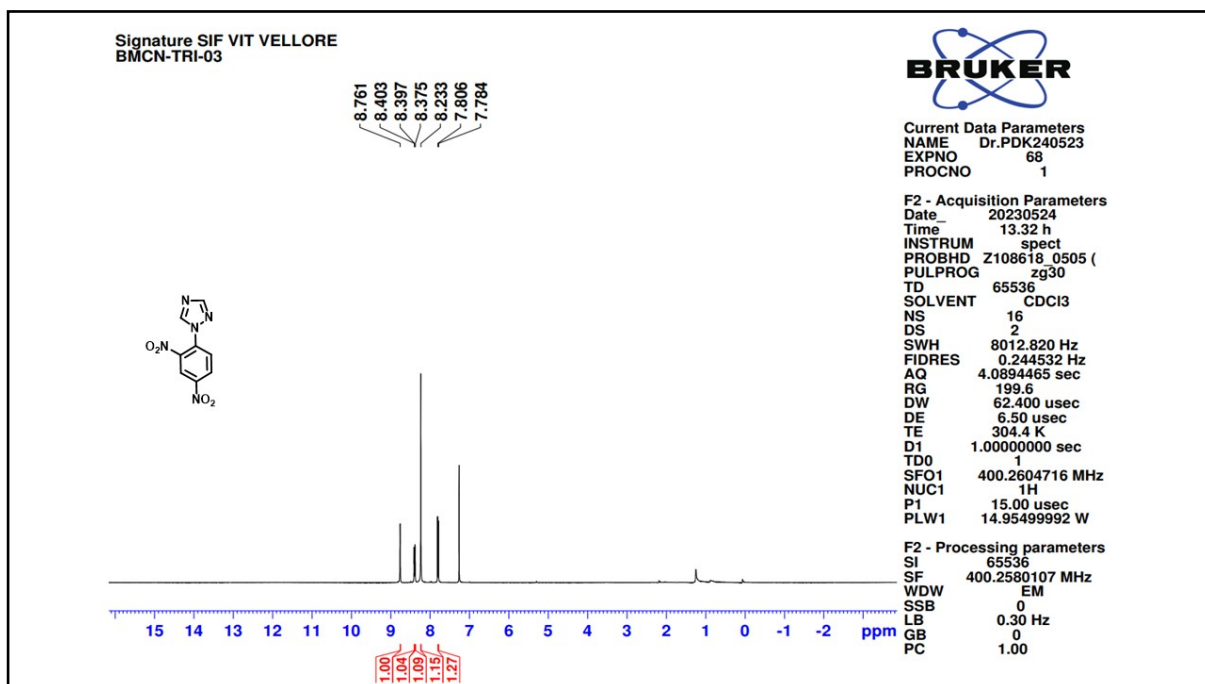

Fig S29.  $^1\text{H}$  NMR spectrum of 1-(2,4-dinitrophenyl)-1H-1,2,4-triazole (A12)

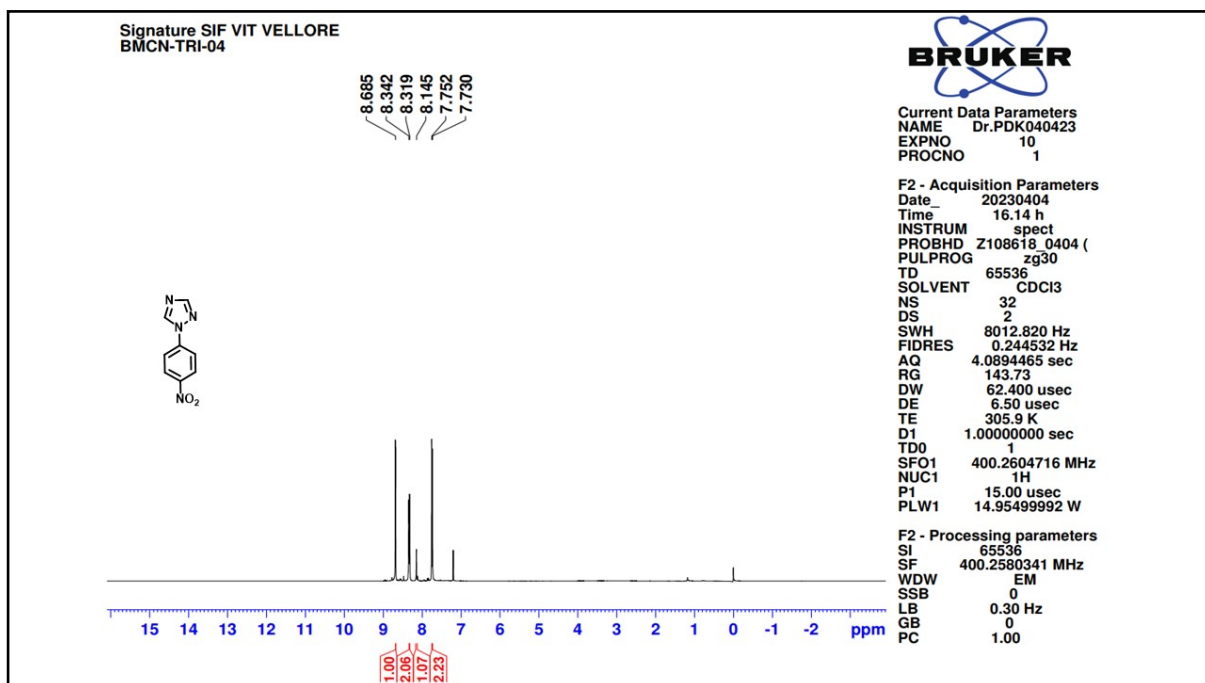

Fig S30.  $^1\text{H}$  NMR spectrum of 1-(4-nitrophenyl)-1H-1,2,4-triazole (A13)

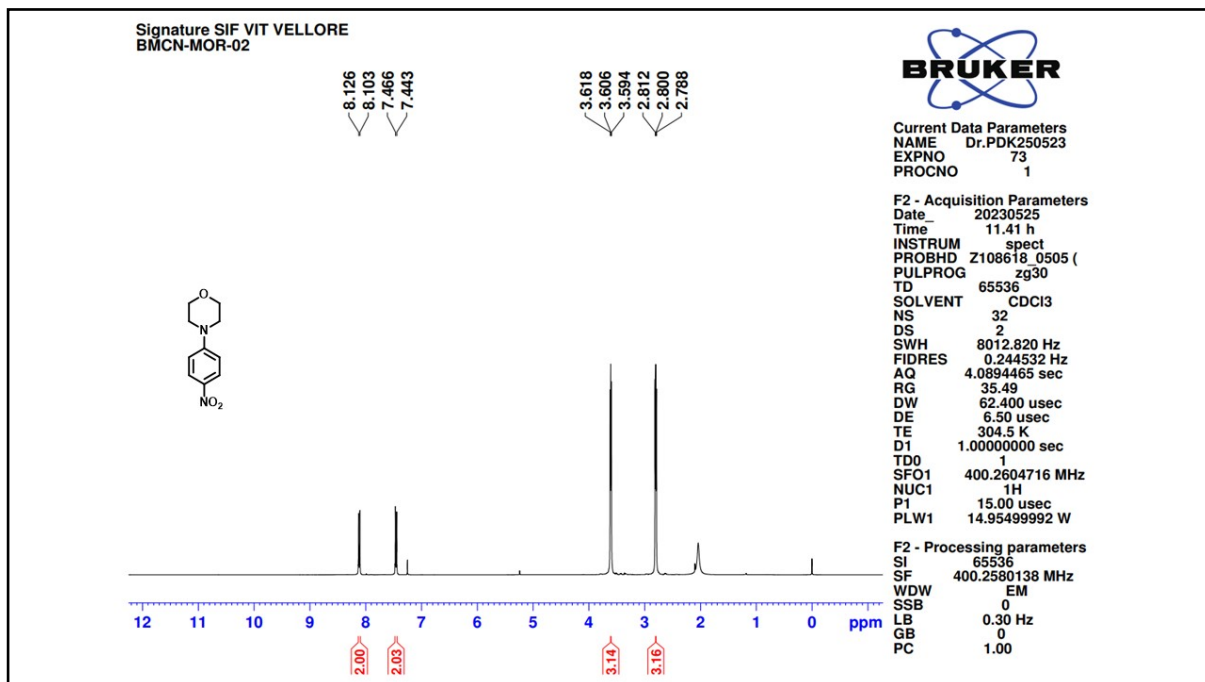

Fig S31. <sup>1</sup>H NMR spectrum of 4-(4-nitrophenyl)morpholine (A14)

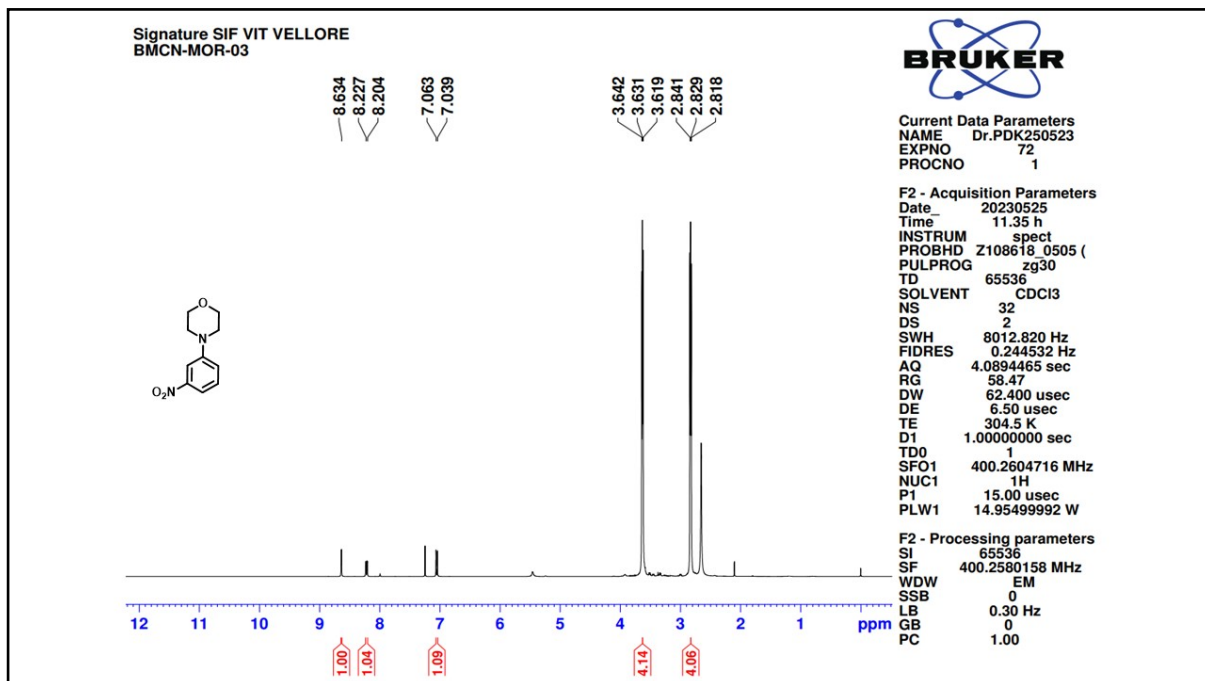

Fig S32. <sup>1</sup>H NMR spectrum of 4-(3-nitrophenyl)morpholine (A15)

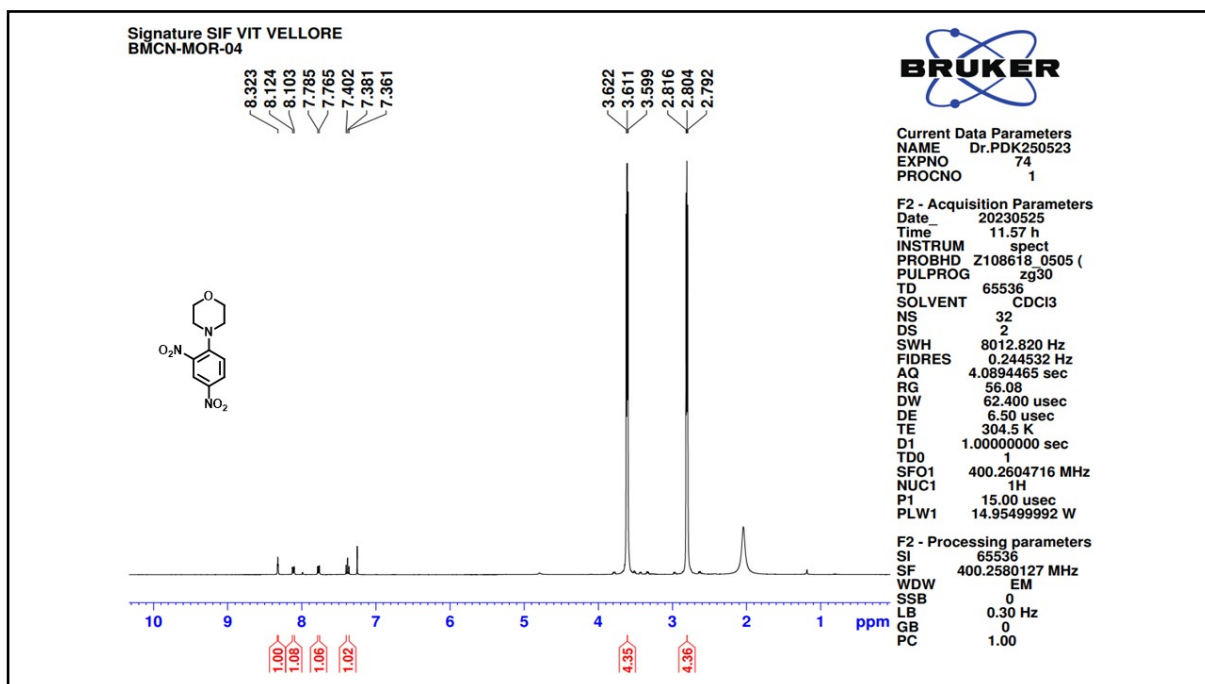

Fig S33. <sup>1</sup>H NMR spectrum of 4-(2,4-dinitrophenyl)morpholine (A16)

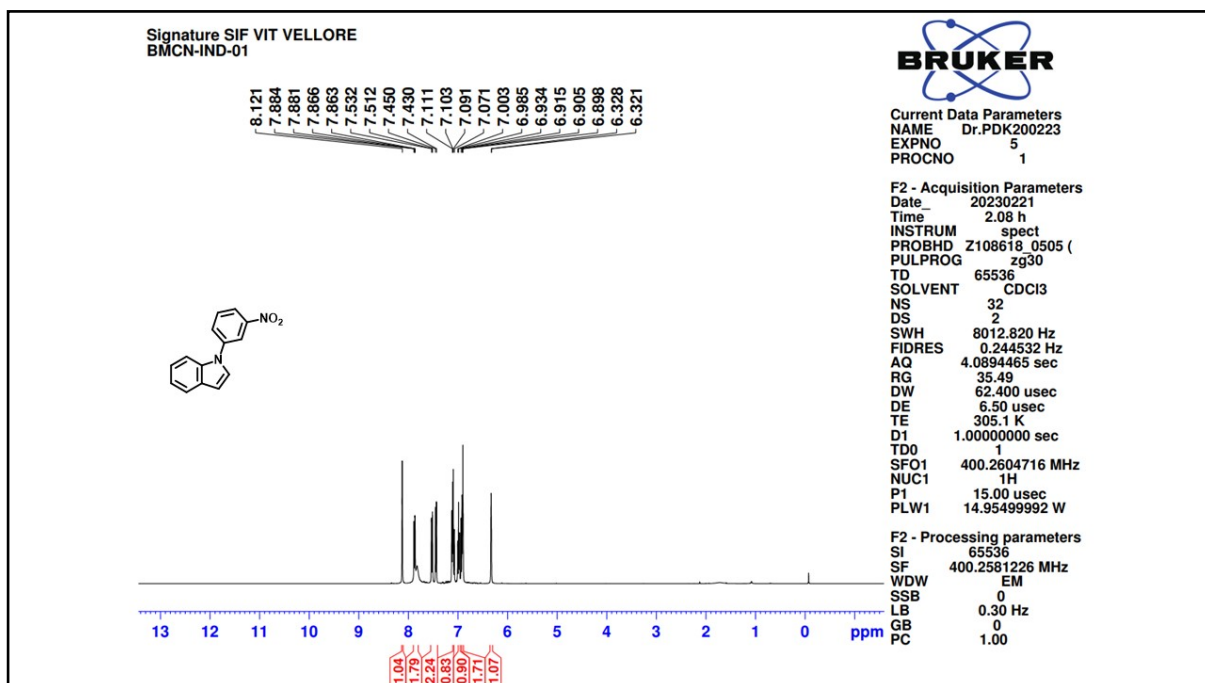

Fig S34. <sup>1</sup>H NMR spectrum of 1-(3-nitrophenyl)-1H-indole (A17)

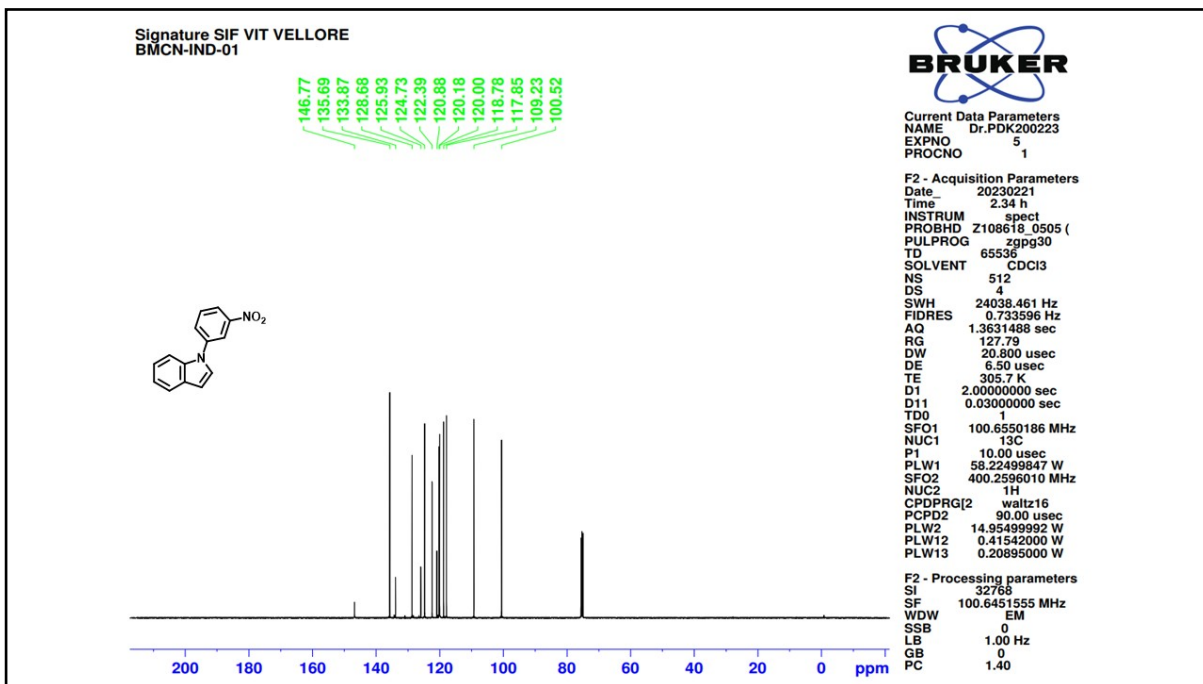

Fig S35. <sup>1</sup>H NMR spectrum of 1-(3-nitrophenyl)-1H-indole (A17)

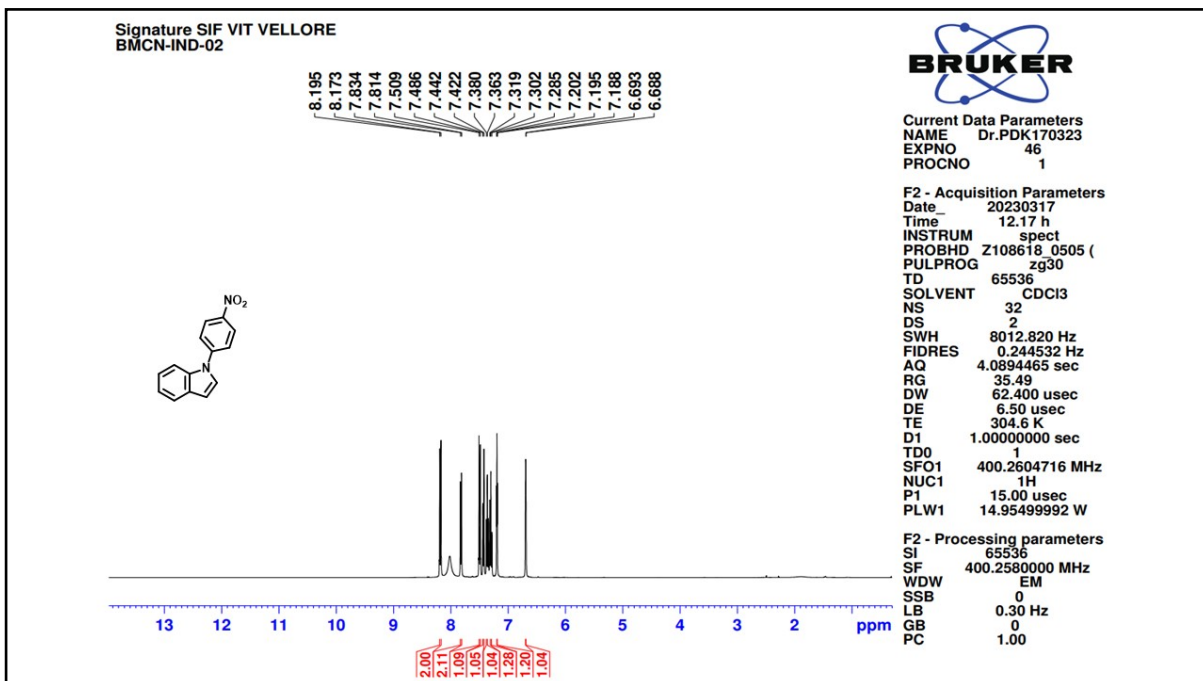

Fig S36. <sup>1</sup>H NMR spectrum of 1-(4-nitrophenyl)-1H-indole (A18)

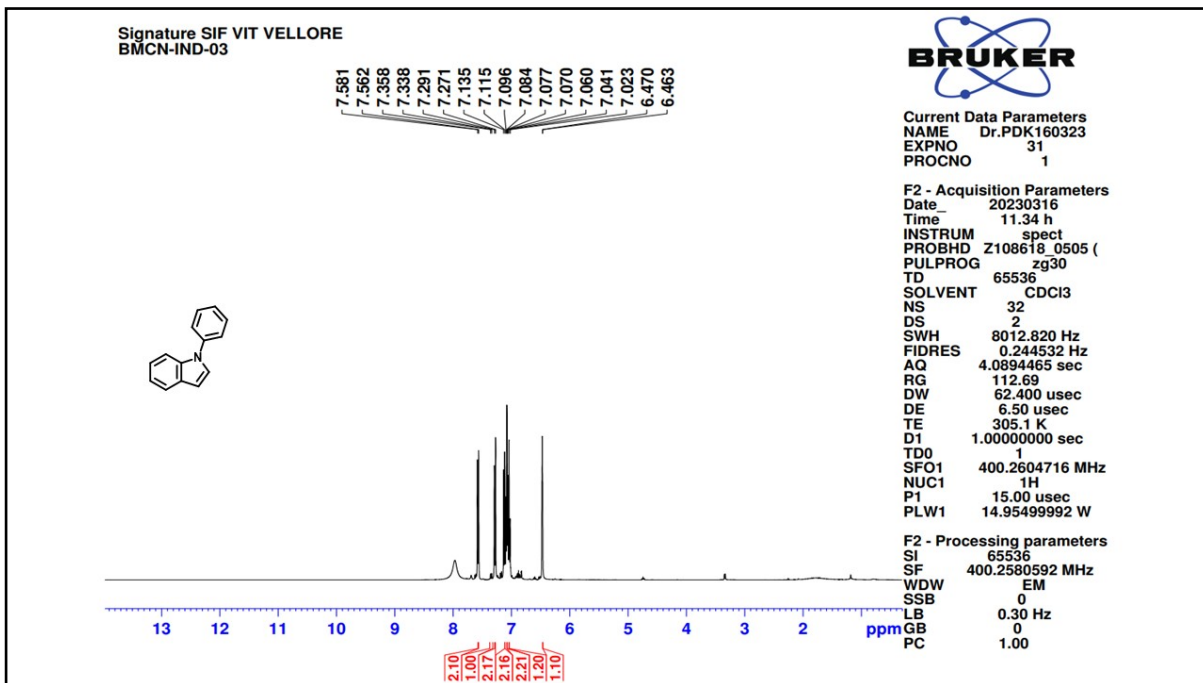

Fig S37. <sup>1</sup>H NMR spectrum of 1-phenyl-1H-indole (A19)

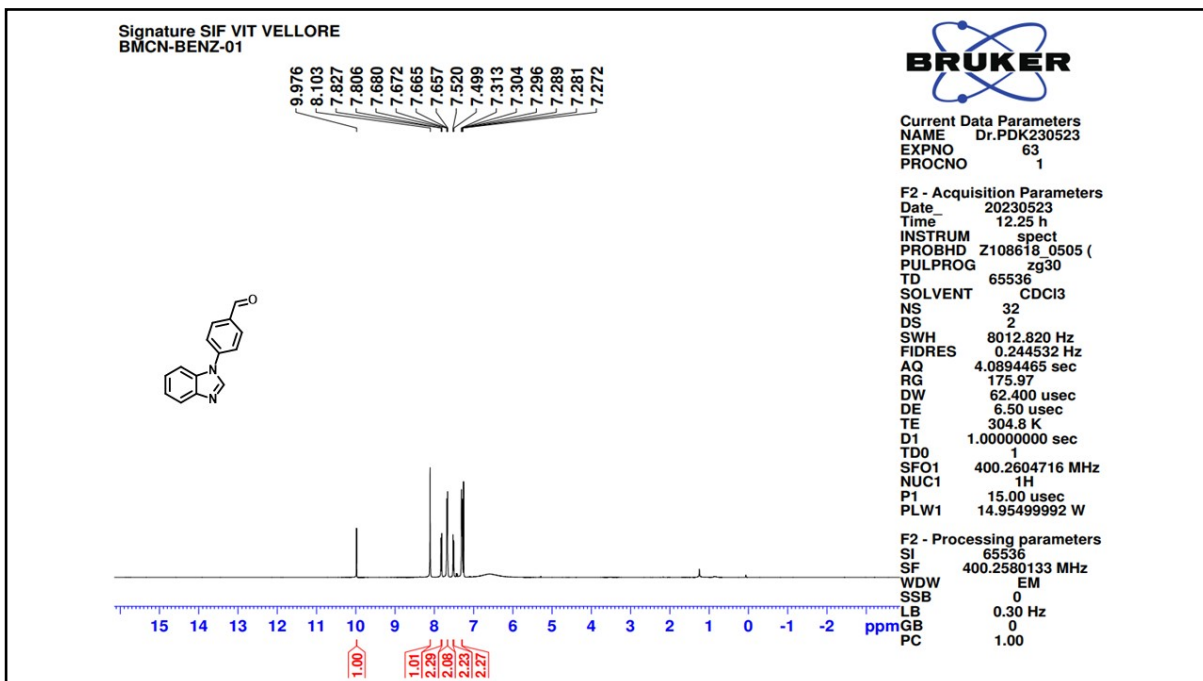

Fig S38. <sup>1</sup>H NMR spectrum of 4-(1H-benzo[d]imidazol-1-yl)benzaldehyde (A20)

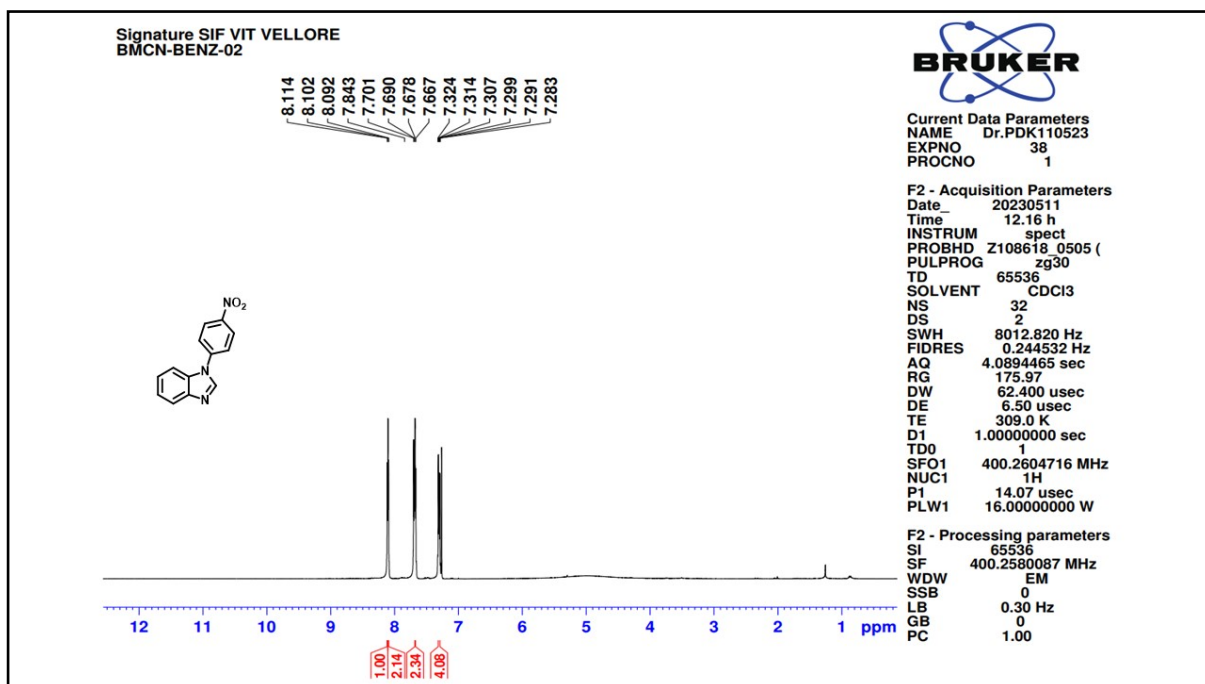

Fig S39. <sup>1</sup>H NMR spectrum of 1-(4-nitrophenyl)-1H-benzo[d]imidazole (A21)

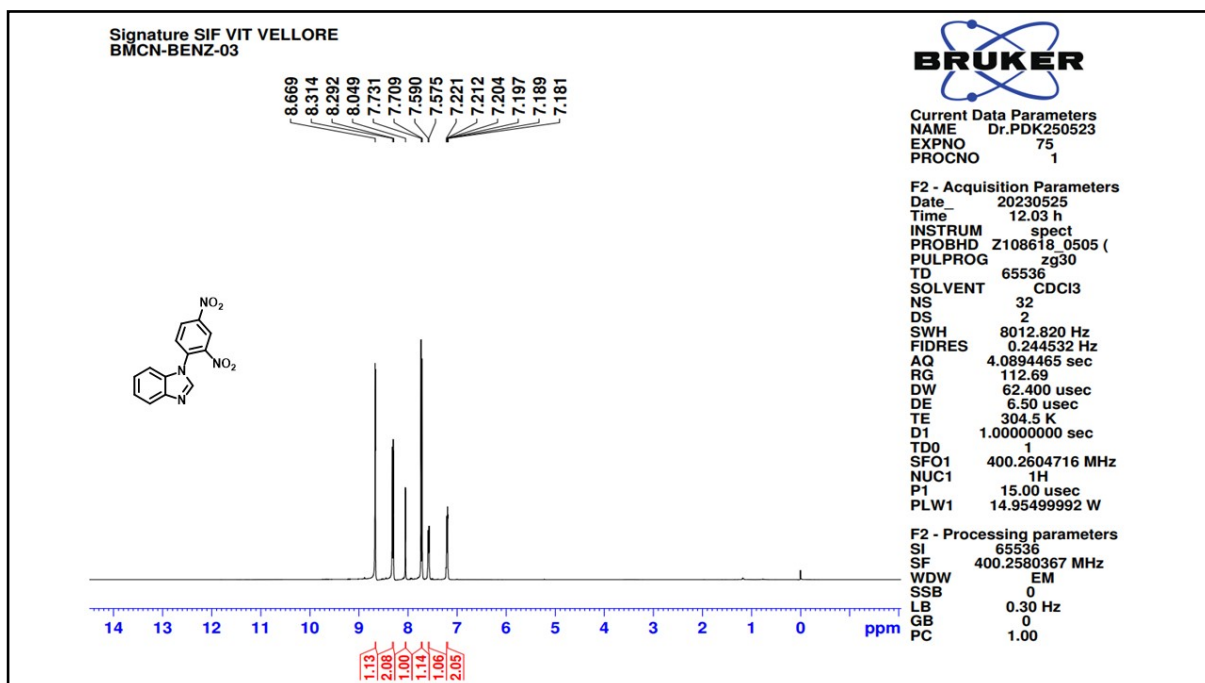

Fig S40. <sup>1</sup>H NMR spectrum of 1-(2,4-dinitrophenyl)-1H-benzo[d]imidazole (A22)



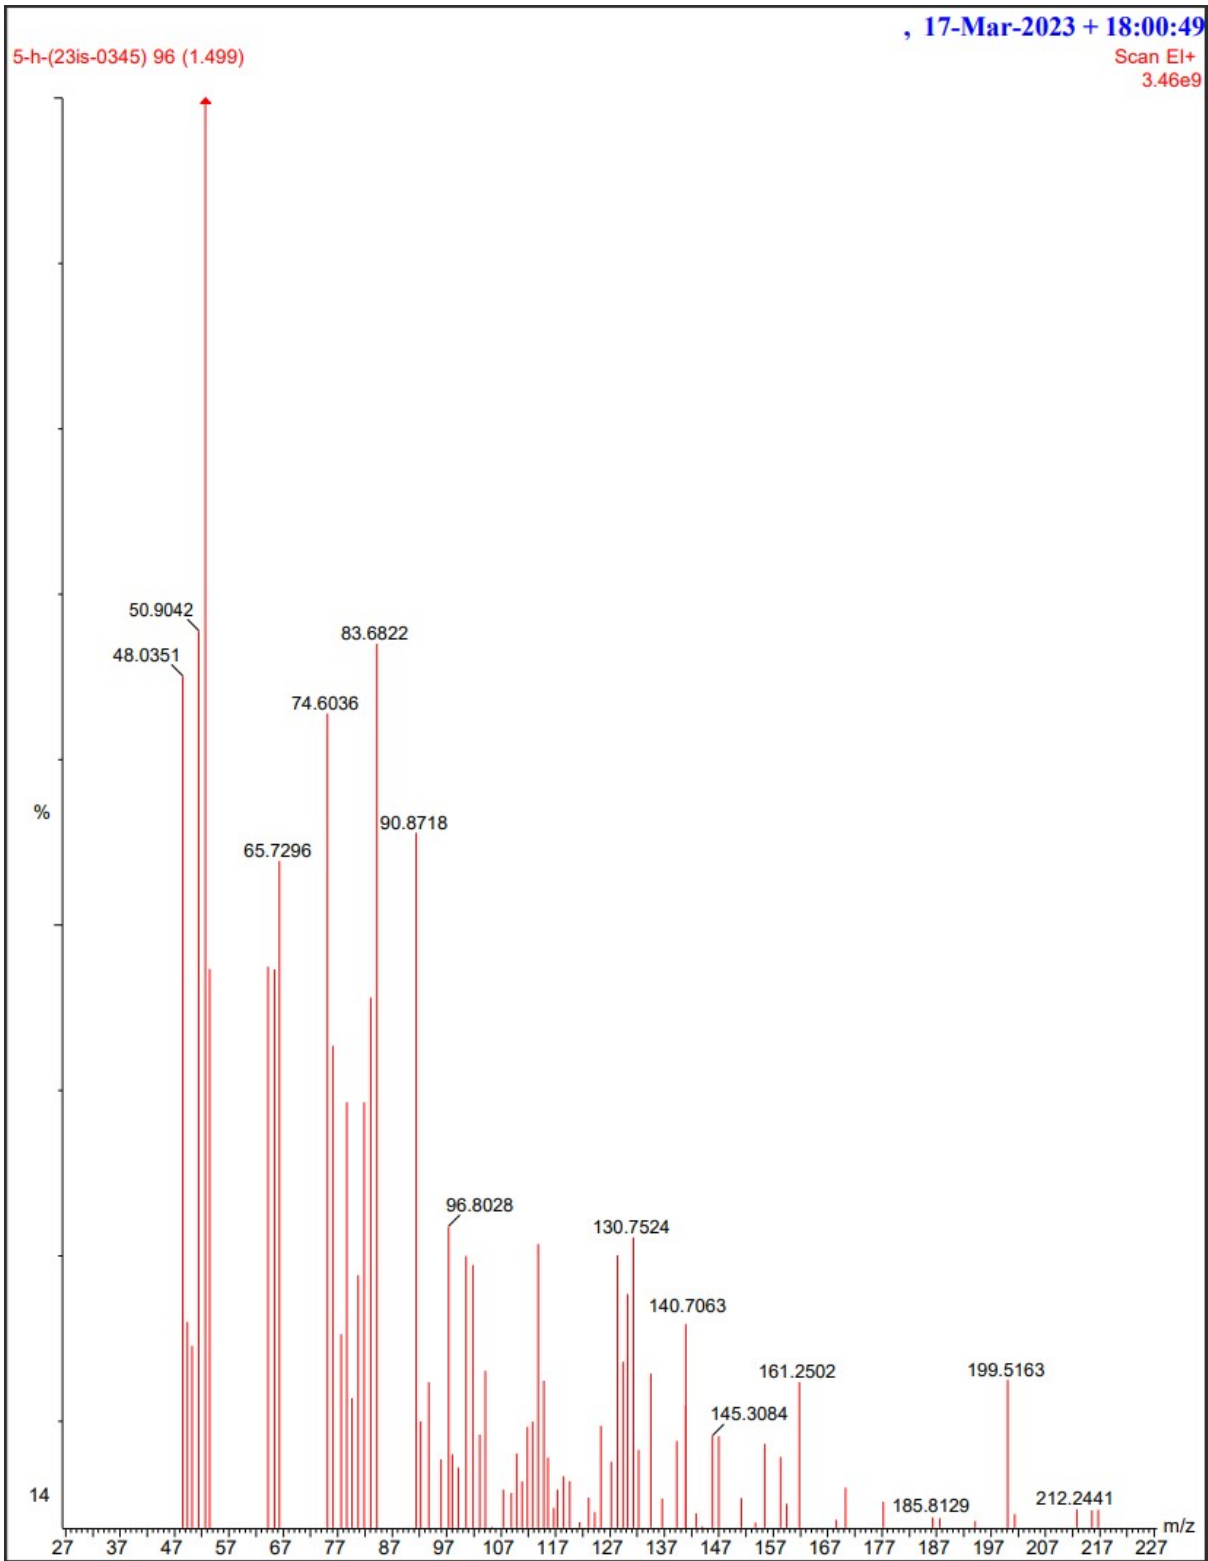

Fig S41. GCMS spectrum of Reaction Mixture after 5 hours

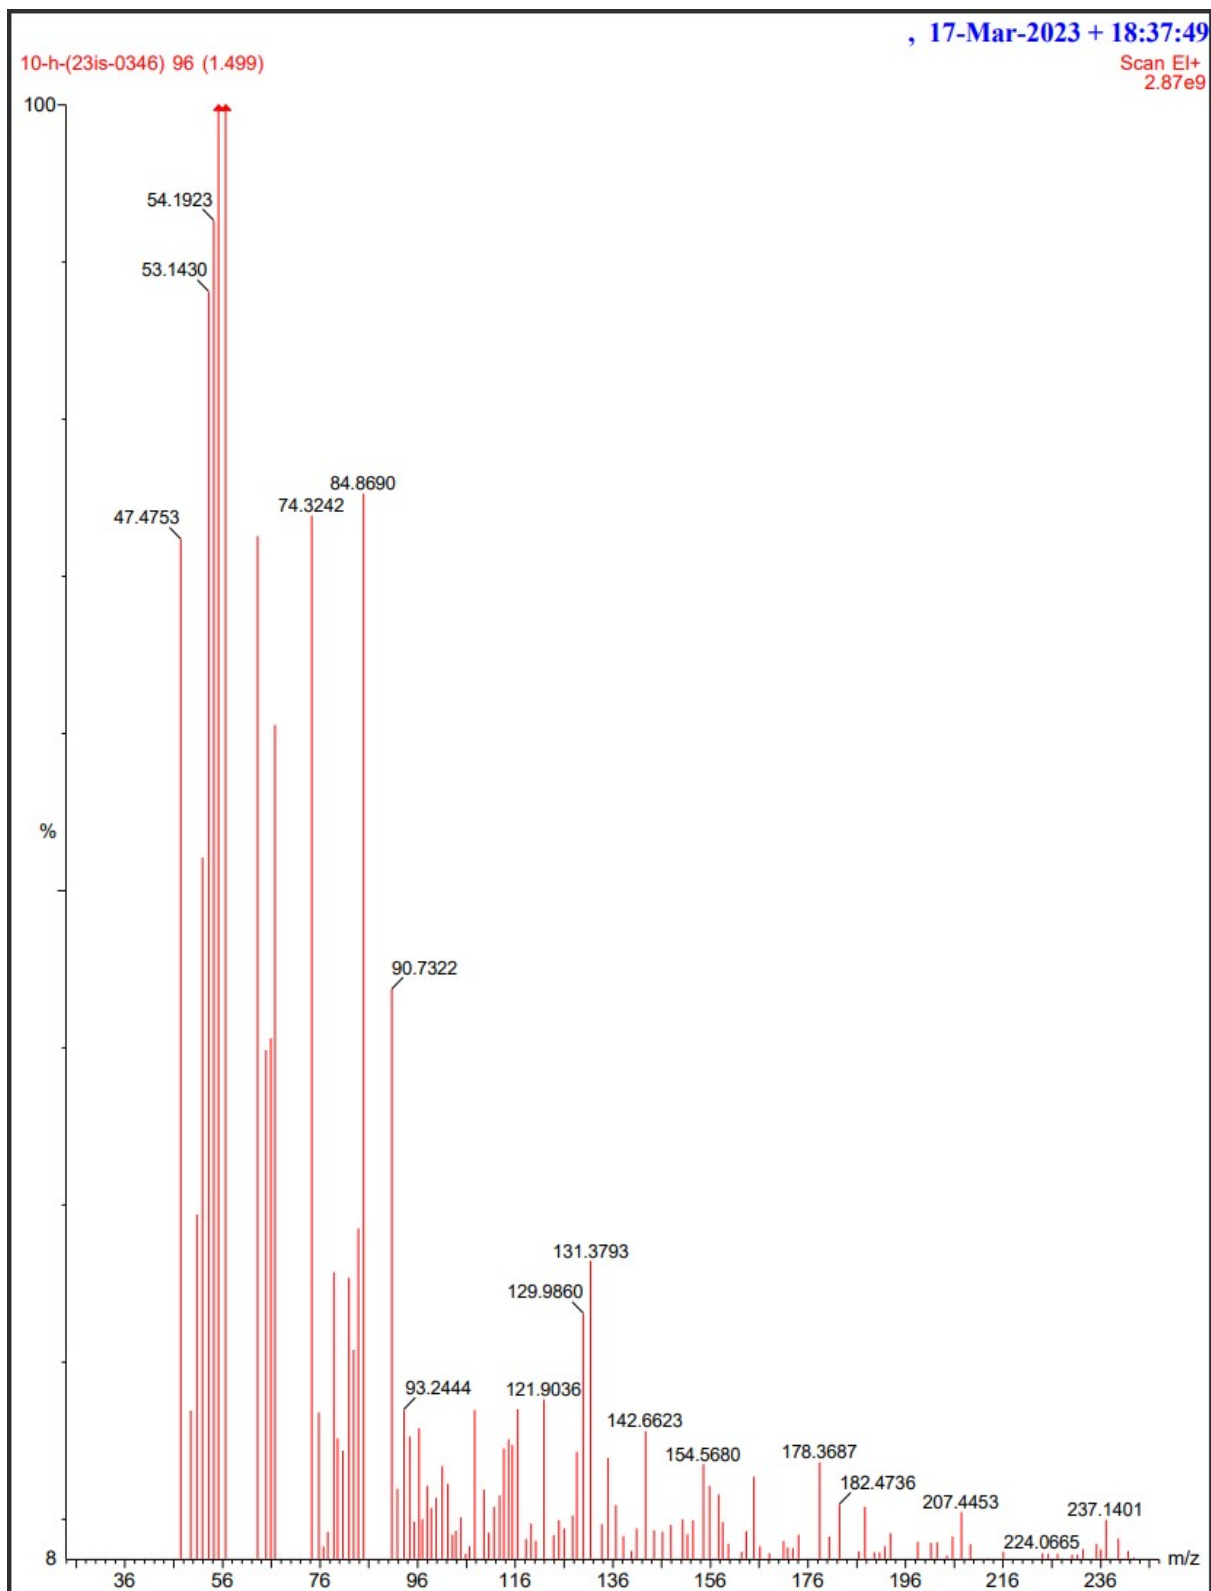

Fig S42. GCMS spectrum of Reaction Mixture after 10 hours

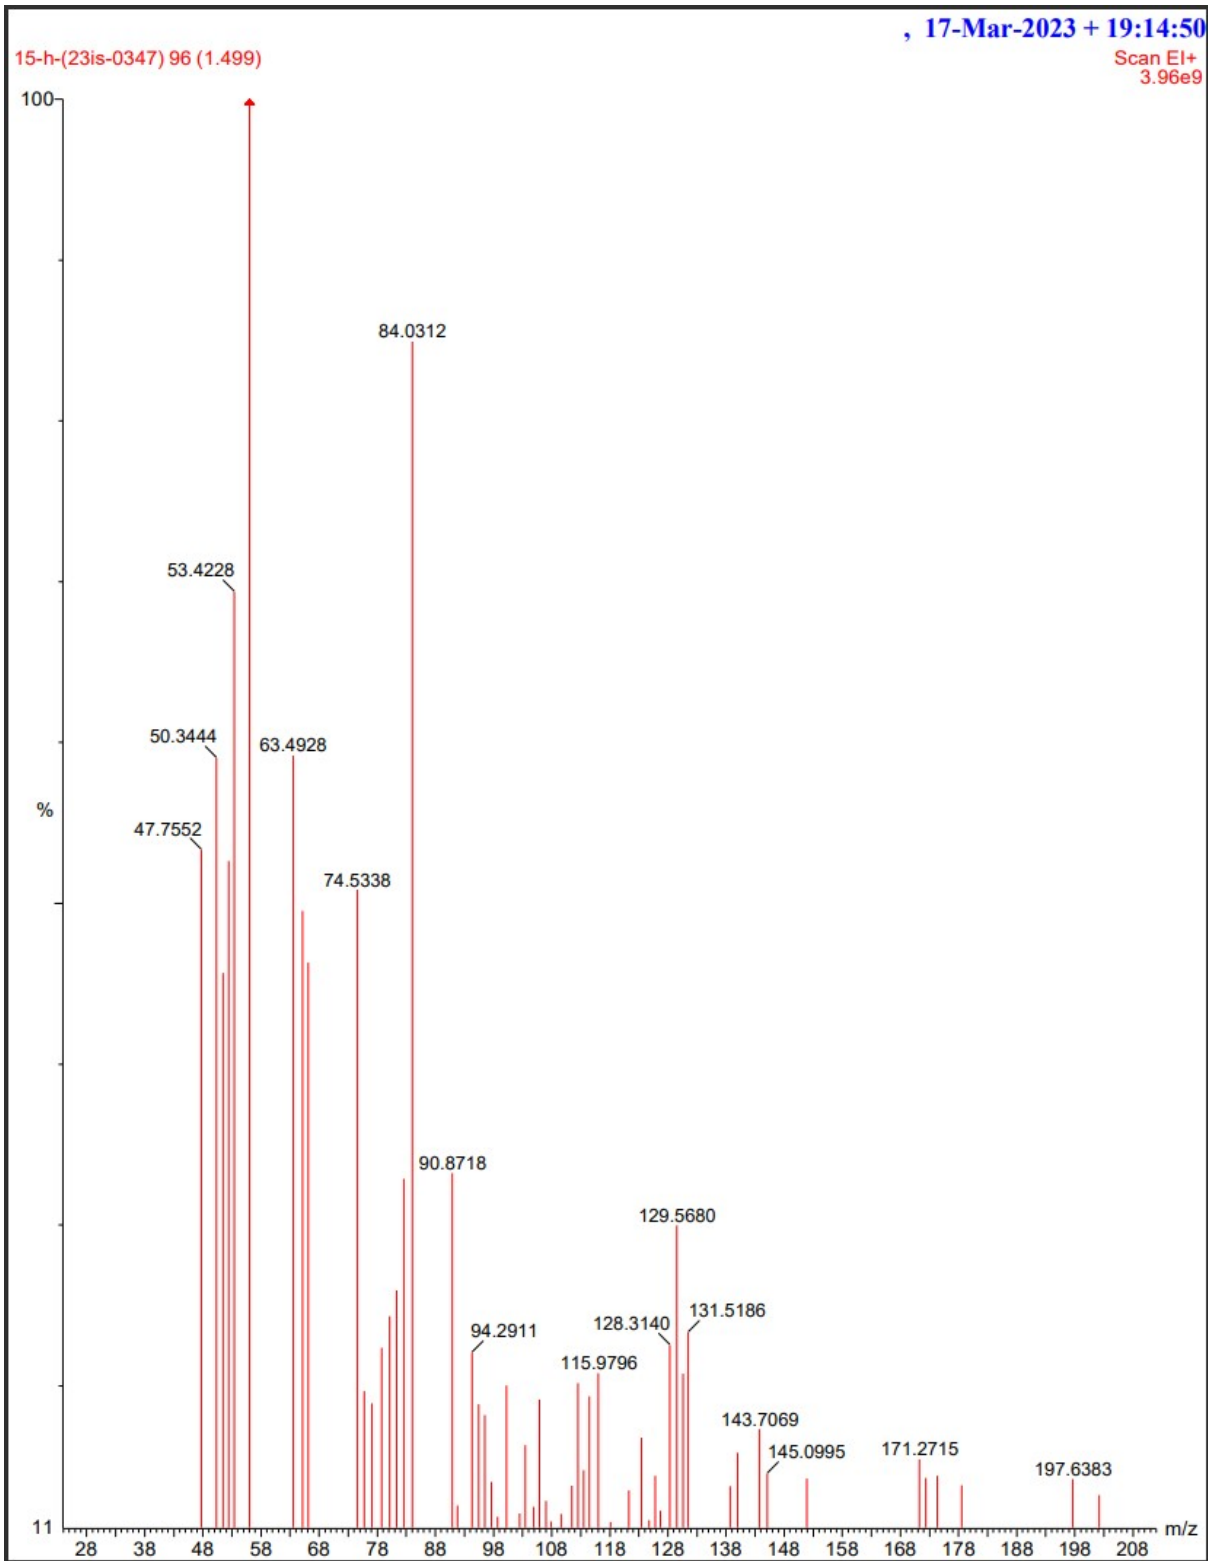

Fig S43. GCMS spectrum of Reaction Mixture after 15 hours

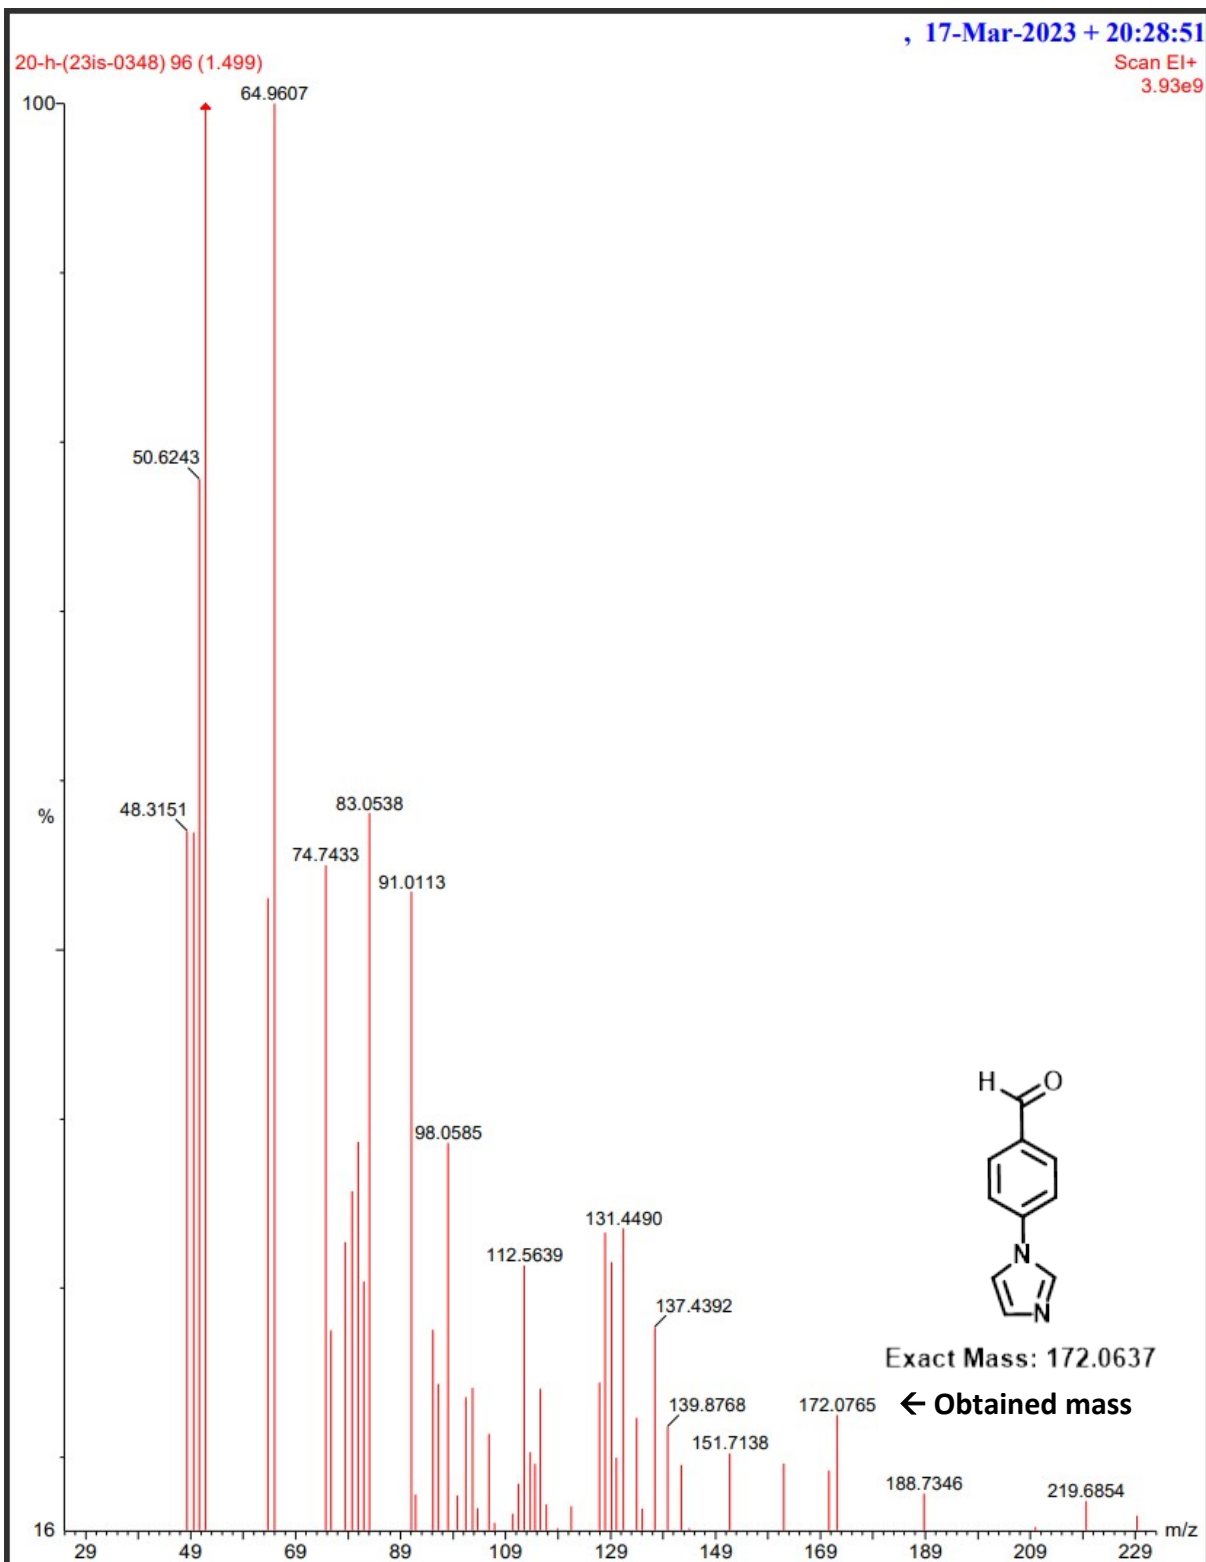

Fig S44. GCMS spectrum of Reaction Mixture after 20 hours

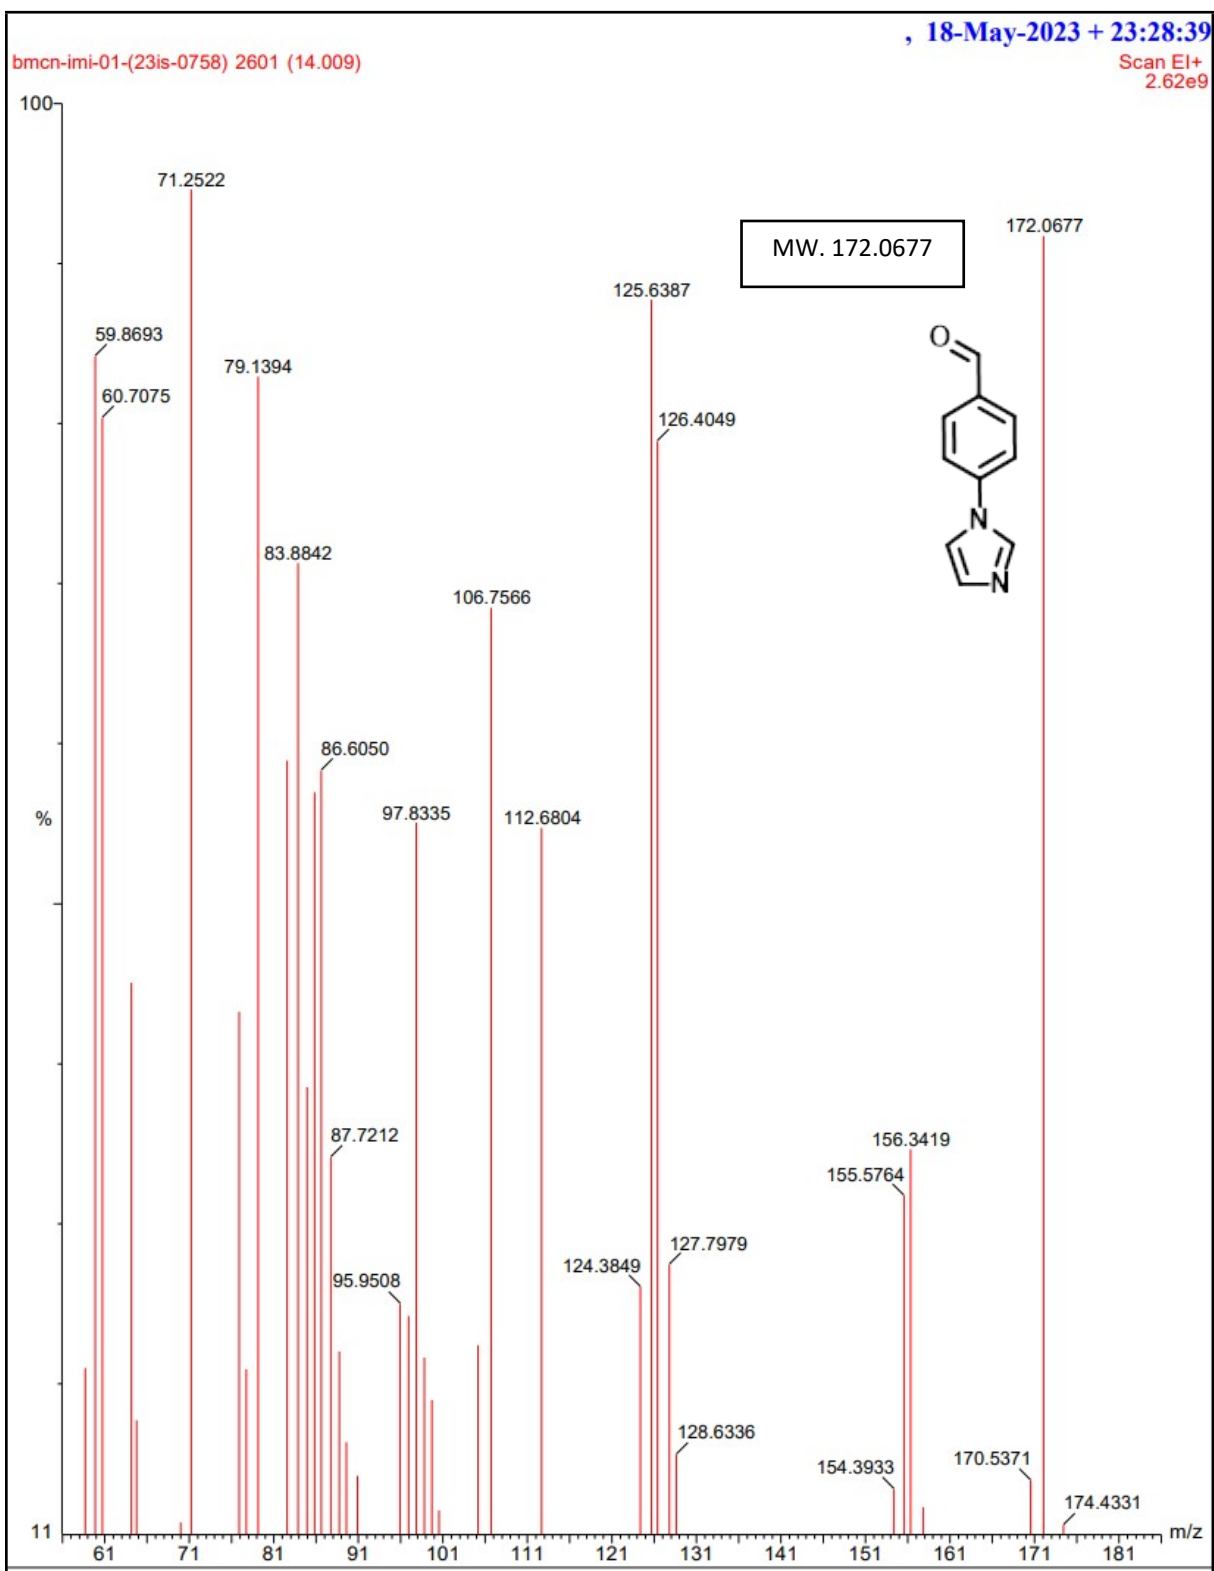

Fig S45. GCMS spectrum of 4-(1H-imidazol-1-yl)benzaldehyde [BMCN-IMI-01]A1

tempo-(23is-01015) 71 (1.354)

Scan EI+  
2.44e9

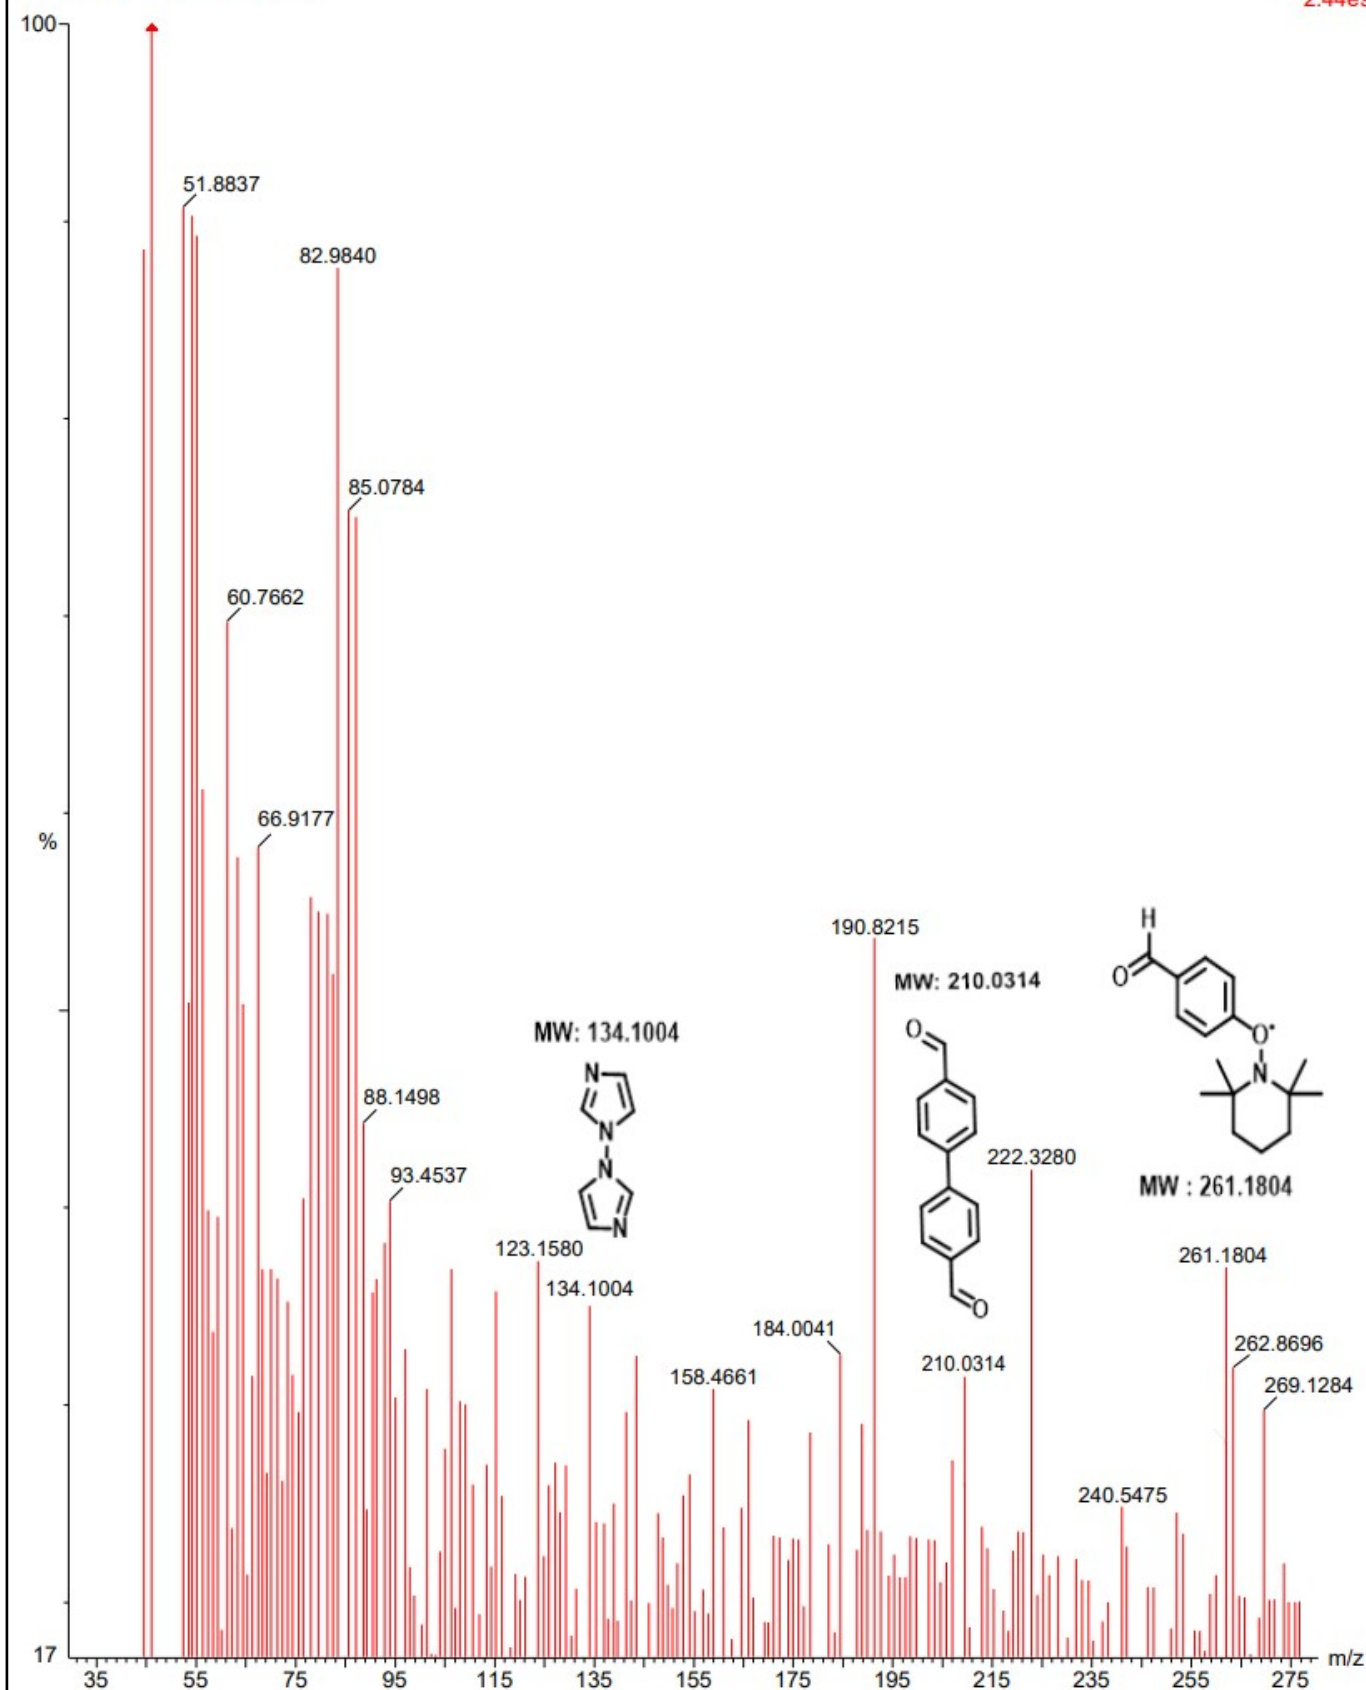

Fig S46. GCMS spectrum of Aryl radical with TEMPO

| Time (h) | A*<br>Under Optimized Reaction conditions | B                                                         | C                                                                                 |
|----------|-------------------------------------------|-----------------------------------------------------------|-----------------------------------------------------------------------------------|
| 0        | R1 + R2 + 20 mg PBILFPc + ACN 10 mL       | R1 + R2 + 20 mg PBILFPc + ACN 10 mL                       | R1 + R2 + 20 mg PBILFPc + ACN 10 mL                                               |
| 5        | Reaction continued                        | Reaction works up to know the yield of the product at 5 h | Photocatalyst removed by filtration and continued reaction under 5 W LED for 20 h |
| 10       | Reaction continued                        |                                                           | Reaction continued                                                                |
| 15       | Reaction continued                        |                                                           | Reaction continued                                                                |
| 20       | Reaction continued                        |                                                           | Reaction continued                                                                |
|          | Product Yield = 91 %                      | Product Yield = 31%                                       | Product Yield = 31 %                                                              |

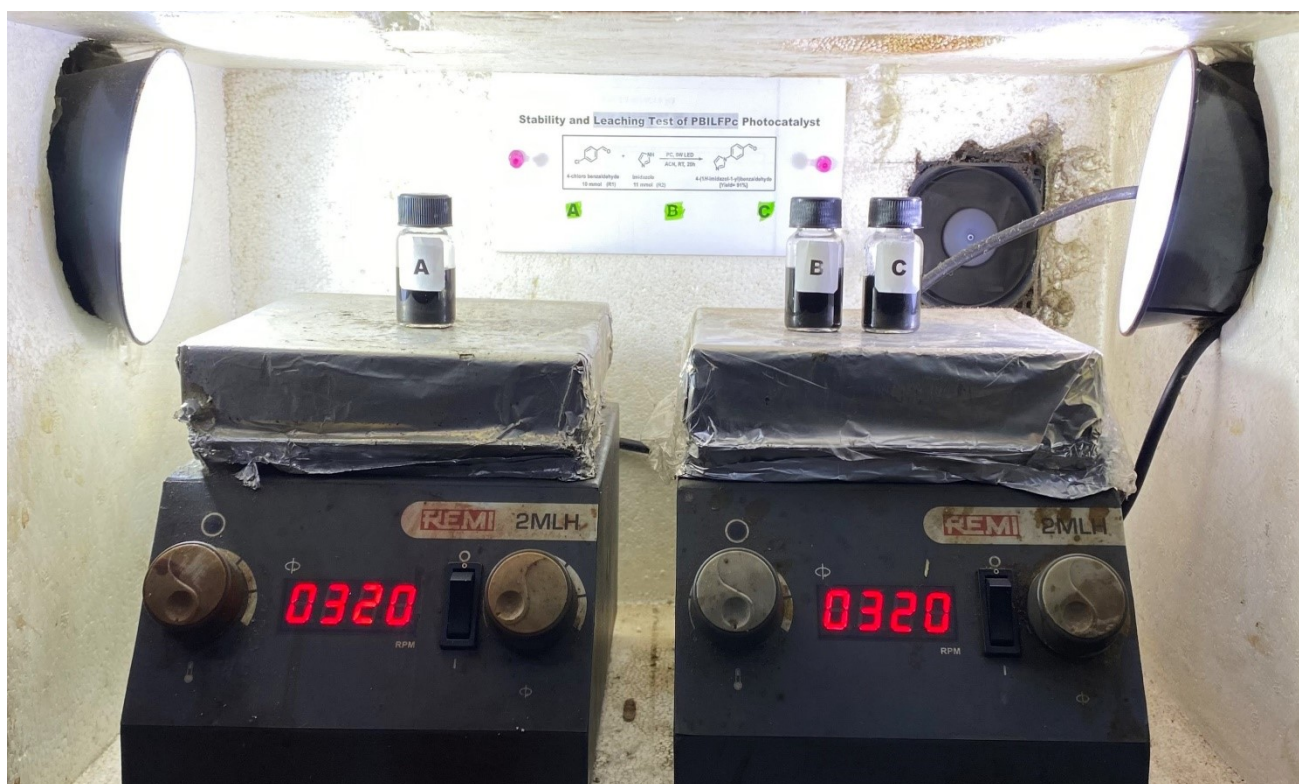

Fig S47. Leaching Test of PBILFPc Photocatalyst.

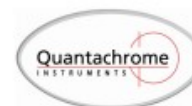

|                      |                      |                     |                          |
|----------------------|----------------------|---------------------|--------------------------|
| <b>Analysis</b>      |                      | <b>Report</b>       |                          |
| Operator:            | VIT                  | Date:               | 2023/07/18               |
| Sample ID:           | PDK-BM-CAT-II-180723 | Filename:           | PDK-BM-CAT-II-180723.qps |
| Sample Desc:         |                      | Comment:            |                          |
| Sample Weight:       | 0.0194 g             | Instrument:         | Autosorb IQ Station 1    |
| Approx. Outgas Time: | 3.6 hrs              | Final Outgas Temp.: | 200 °C                   |
| Analysis gas:        | Nitrogen             | Non-ideality:       | 6.58e-05 1/Torr          |
| Analysis Time:       | 1:10 hr:min          | Bath temp.:         | 77.35 K                  |
| Analysis Mode:       | Standard             |                     |                          |
| VoidVol. Mode:       | He Measure           | Cold Zone V:        | 3.70928 cc               |
|                      |                      | Operator:           | VIT                      |
|                      |                      | Date:               | 2023/07/19               |
|                      |                      | Extended info:      | Available                |
|                      |                      | CellType:           | 9mm                      |
|                      |                      | VoidVol Remeasure:  | off                      |
|                      |                      | Warm Zone V:        | 13.1482 cc               |

**Multi-Point BET**

**Data Reduction Parameters Data**

|                        |                           |                                      |                                     |
|------------------------|---------------------------|--------------------------------------|-------------------------------------|
| <b>Adsorbate model</b> | Thermal Transpiration: on | Eff. mol. diameter (D): 3.54 Å       | Eff. cell stem diam. (d): 4.0000 mm |
|                        | Nitrogen                  | Temperature 77.350K                  |                                     |
|                        | Molec. Wt.: 28.013        | Cross Section: 16.200 Å <sup>2</sup> | Liquid Density: 0.808 g/cc          |

**Multi-Point BET Data**

| Relative Pressure [P/Po] | Volume @ STP [cc/g] | 1 / [ W((Po/P) - 1) ] [1/g] | Relative Pressure [P/Po] | Volume @ STP [cc/g] | 1 / [ W((Po/P) - 1) ] [1/g] |
|--------------------------|---------------------|-----------------------------|--------------------------|---------------------|-----------------------------|
| 1.01160e-01              | 5.8469              | 1.5401e+01                  | 2.51051e-01              | 14.2562             | 1.8813e+01                  |
| 1.51146e-01              | 8.6003              | 1.6566e+01                  | 2.99693e-01              | 19.5383             | 1.7525e+01                  |
| 2.00873e-01              | 11.4228             | 1.7607e+01                  |                          |                     |                             |

**BET summary**

Slope = 13.116 1/g  
 Intercept = 1.455e+01 1/g  
 Correlation coefficient, r = 0.807893  
 C constant = 1.902  
 Surface Area = 125.882 m<sup>2</sup>/g

Fig S48. BET Surface Area of PBILFPc Photocatalyst.



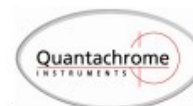

|                      |                      |                     |                          |
|----------------------|----------------------|---------------------|--------------------------|
| <b>Analysis</b>      |                      | <b>Report</b>       |                          |
| Operator:            | VIT                  | Date:               | 2023/07/18               |
| Sample ID:           | PDK-BM-CAT-II-180723 | Filename:           | PDK-BM-CAT-II-180723.qps |
| Sample Desc:         |                      | Comment:            |                          |
| Sample Weight:       | 0.0194 g             | Instrument:         | Autosorb IQ Station 1    |
| Approx. Outgas Time: | 3.6 hrs              | Final Outgas Temp.: | 200 °C                   |
| Analysis gas:        | Nitrogen             | Non-ideality:       | 6.58e-05 1/Torr          |
| Analysis Time:       | 1:10 hr:min          | Bath temp.:         | 77.35 K                  |
| Analysis Mode:       | Standard             |                     |                          |
| VoidVol. Mode:       | He Measure           | Cold Zone V:        | 3.70928 cc               |
|                      |                      | Operator:           | VIT                      |
|                      |                      | Date:               | 2023/07/19               |
|                      |                      | Extended info:      | Available                |
|                      |                      | CellType:           | 9mm                      |
|                      |                      | VoidVol Remeasure:  | off                      |
|                      |                      | Warm Zone V:        | 13.1482 cc               |

**Isotherm**

**Data Reduction Parameters Data**

|                        |          |                         |                       |                           |            |
|------------------------|----------|-------------------------|-----------------------|---------------------------|------------|
| Thermal Transpiration: | on       | Eff. mol. diameter (D): | 3.54 Å                | Eff. cell stem diam. (d): | 4.0000 mm  |
| Adsorbate model:       | Nitrogen | Temperature             | 77.350K               |                           |            |
| Molec. Wt.:            | 28.013   | Cross Section:          | 16.200 Å <sup>2</sup> | Liquid Density:           | 0.808 g/cc |

**Isotherm Data**

| Relative Pressure | Volume @ STP [cc/g] | Relative Pressure | Volume @ STP [cc/g] | Relative Pressure | Volume @ STP [cc/g] |
|-------------------|---------------------|-------------------|---------------------|-------------------|---------------------|
| 5.14290e-02       | 3.0293              | 7.50562e-01       | 51.9415             | 5.99838e-01       | 49.4972             |
| 1.01160e-01       | 5.8469              | 8.00023e-01       | 55.4085             | 5.49707e-01       | 46.1393             |
| 1.51146e-01       | 8.6003              | 8.48867e-01       | 59.0659             | 4.99487e-01       | 42.6190             |
| 2.00873e-01       | 11.4228             | 9.01418e-01       | 62.8823             | 4.49537e-01       | 39.2034             |
| 2.51051e-01       | 14.2562             | 9.49482e-01       | 66.3261             | 3.99568e-01       | 35.3820             |
| 2.99693e-01       | 19.5383             | 9.94247e-01       | 91.9689             | 3.49602e-01       | 31.5638             |
| 3.50258e-01       | 23.6354             | 9.93438e-01       | 89.6739             | 2.99576e-01       | 27.6544             |
| 4.00412e-01       | 27.3751             | 9.50859e-01       | 70.4747             | 2.49551e-01       | 23.7072             |
| 4.50805e-01       | 30.7916             | 8.99781e-01       | 67.5018             | 1.99747e-01       | 19.5642             |
| 5.00173e-01       | 34.3641             | 8.50510e-01       | 64.6092             | 1.49557e-01       | 15.3359             |
| 5.50398e-01       | 37.9283             | 8.00176e-01       | 61.6616             | 9.96401e-02       | 11.1639             |
| 6.00149e-01       | 41.4892             | 7.50897e-01       | 58.6172             | 5.16977e-02       | 6.8480              |
| 6.50263e-01       | 45.0035             | 7.00484e-01       | 55.5266             |                   |                     |
| 7.00302e-01       | 48.6208             | 6.49412e-01       | 52.7108             |                   |                     |

Fig S49. BET Isotherm Parameters of PBILFPc Photocatalyst.

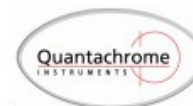

|                      |                      |                     |                          |
|----------------------|----------------------|---------------------|--------------------------|
| <b>Analysis</b>      |                      | <b>Report</b>       |                          |
| Operator:            | VIT                  | Date:               | 2023/07/18               |
| Sample ID:           | PDK-BM-CAT-II-180723 | Filename:           | PDK-BM-CAT-II-180723.qps |
| Sample Desc:         |                      | Comment:            |                          |
| Sample Weight:       | 0.0194 g             | Instrument:         | Autosorb IQ Station 1    |
| Approx. Outgas Time: | 3.6 hrs              | Final Outgas Temp.: | 200 °C                   |
| Analysis gas:        | Nitrogen             | Non-Ideality:       | 6.58e-05 1/Torr          |
| Analysis Time:       | 1:10 hr:min          | Bath temp.:         | 77.35 K                  |
| Analysis Mode:       | Standard             |                     |                          |
| VoidVol. Mode:       | He Measure           | Cold Zone V:        | 3.70928 cc               |
|                      |                      | Operator:           | VIT                      |
|                      |                      | Date:               | 2023/07/19               |
|                      |                      | Extended info:      | Available                |
|                      |                      | CellType:           | 9mm                      |
|                      |                      | VoidVol Remeasure:  | off                      |
|                      |                      | Warm Zone V:        | 13.1482 cc               |

**Isotherm : Linear**

| Data Reduction Parameters |                           |                                |                                     |
|---------------------------|---------------------------|--------------------------------|-------------------------------------|
| Adsorbate model           | Thermal Transpiration: on | Eff. mol. diameter (D): 3.54 Å | Eff. cell stem diam. (d): 4.0000 mm |
|                           | Nitrogen                  | Temperature 77.350K            |                                     |
|                           | Molec. Wt.: 28.013        | Cross Section: 16.200 Å²       | Liquid Density: 0.808 g/cc          |

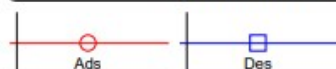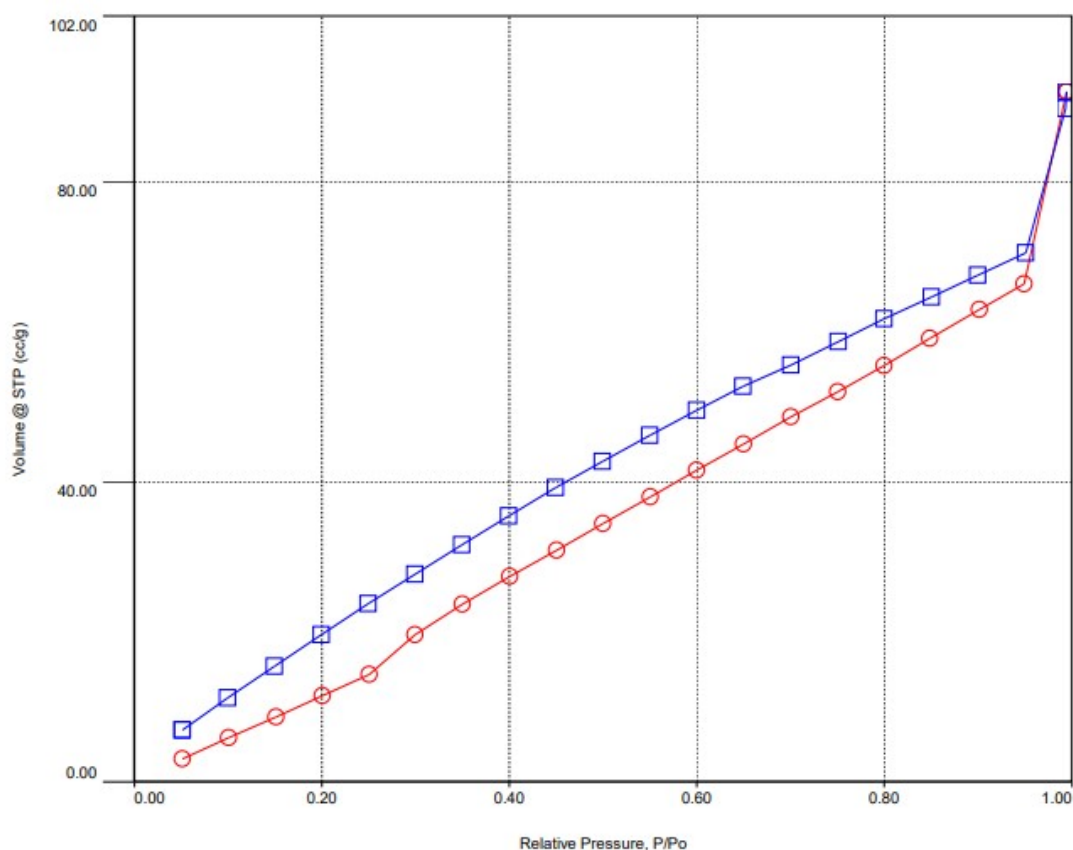

Fig S50. BET Adsorption/Desorption Isotherm of PBILFPc Photocatalyst.

## TON & TOF Calculation as per the reviewer's suggestion

The TON of the photocatalyst was found to be 9,33,333 and TOF is 46,666. The detailed calculation are as follows:

$$\text{Molecular Weight of the Photocatalyst} = 1026.071$$

$$\text{Quantity of Photocatalyst utilized for the reaction } 20\text{mg} = 0.02\text{g}$$

$$\begin{aligned}\text{Moles of Photocatalyst} &= (0.02/1026.071) \times 100 = \\ &= 0.00195\end{aligned}$$

$$\text{For TON} = (\text{Optimized time of reaction} \times \text{yield of reaction}) / \text{moles of Photocatalyst}$$

$$= (20 \times 91) / 0.00195$$

$$= 9,33,333.33$$

$$\text{For TOF} = \text{TON} / \text{Reaction Time}$$

$$= 9,33,333.33 / 20$$

$$= 46,666.67 \text{ h}^{-1}$$

## Preparation of Stock Solution for UV-visible and Fluorescence Spectroscopy

A 1mM Stock solution of PBILFPc Photocatalyst was prepared.

A standard working concentration of  $2 \times 10^{-5}$  M was used for UV-visible and Fluorescence spectroscopy studies.

$$W = \frac{NEV}{1000} = \frac{(10^{-3} \times 1026.071 \times 10)}{1000}$$

$$W = 10.26 \times 10^{-3} \text{ g}$$

$$W = 10 \text{ mg in } 10\text{mL DMSO}$$

$$\text{Stock} = 10^{-3} \text{ M in DMSO (10mL)}$$

Note: Due to the heterogeneous nature of the Photocatalyst, it is difficult for us to properly dissolve it in DMSO, we gave gentle heating and sonication to the stock solution, and after we took it for analysis.

Now Working Concentration

$$\text{Stock Solution} : \text{Working Solution}$$

$$N_1V_1 = N_2V_2$$

$$10^{-3} \times 40\mu\text{L} = N_2 \times 2\text{mL}$$

$$N_2 = (10^{-3} \times 40 \times 10^{-3}\text{mL}) / 2$$

$$N_2 = 2 \times 10^{-5} \text{ M}$$
